# Supplementary material
Source: PubMed Central journal article supplement (PMC3341551)
Supplement: mmc1.pdf [file mmc1.pdf]

# Supporting Material

## Methods

### Animal care

This study was approved by the Norwegian National Committee for Animal Welfare under the Norwegian Animal Welfare Act, which conforms to the *Guide for the Care and Use of Laboratory Animals* published by the US National Institutes of Health (NIH publication No. 85-23, revised 1996). Inducible, cardiomyocyte-specific disruption of the *Serca2* gene was attained by employing *Serca2<sup>fllox/fllox</sup>* Tg( $\alpha$ MHC-MerCreMer) mice (KO) (1). Gene excision in 8-10 week old mice was accomplished by inclusion of tamoxifen powder (RM1 FG SQC, 811004, Scanbur BK) in the feed (100 mg/200 g) for 7 days (2, 3). *Serca2<sup>fllox/fllox</sup>* mice (FF) served as controls (1, 4). Tamoxifen treatment results in *Serca2* gene excision exclusively in the cardiomyocytes of KO animals (1). Hearts were harvested at 4 and 7 weeks following tamoxifen administration.

### Cardiomyocyte experiments

Cardiomyocytes were isolated by retrograde perfusion of the heart with enzyme-containing solutions (1, 5). Isolated cells were then plated on laminin-coated coverslips and placed in a perfusion chamber on the stage of an inverted microscope. Intracellular  $[Ca^{2+}]_i$  was measured in myocytes loaded with fluo-4 AM (Invitrogen Molecular Probes, Eugene, OR, USA). Diastolic  $[Ca^{2+}]_i$  levels were first measured in cardiomyocytes pipette-loaded with fura-2. These mean values were then used to calibrate the  $[Ca^{2+}]_i$  transients measured in fluo-4 loaded cells, as previously described (3).  $[Ca^{2+}]_i$  transients were elicited by field stimulation (3 ms biphasic pulse, 25% above threshold) during perfusion with HEPES Tyrode solution containing (in mmol/L): 140 NaCl, 1 CaCl<sub>2</sub>, 0.5 MgCl<sub>2</sub>, 5.0 HEPES, 5.5 glucose, 0.4 NaH<sub>2</sub>PO<sub>4</sub> and 5.4 KCl (pH 7.4, 37°C). In these experiments, an LSM 510 microscope (Zeiss GmbH, Jena, Germany) was used to record  $[Ca^{2+}]_i$  transients in line-scan mode (6).

SR function was assessed by whole-cell fluorescence (Photon Technology International, Monmouth Junction, NJ, USA) recordings of intracellular  $[Ca^{2+}]_i$ . SR Ca<sup>2+</sup> content was estimated by rapidly switching to an extracellular solution containing 10 mmol/L caffeine and measuring the magnitude of the elicited Ca<sup>2+</sup> release. The SR-dependent component of the  $[Ca^{2+}]_i$  transient was calculated by comparing the magnitude of  $[Ca^{2+}]_i$  transients in the presence and absence of caffeine. The difference in the declining phase of the  $[Ca^{2+}]_i$  transient under these two conditions was used to estimate rate constants for  $[Ca^{2+}]_i$  re-uptake (SERCA activity) and extrusion (7). The contribution of NCX and PMCA to Ca<sup>2+</sup> extrusion was estimated by comparing the declining phase of caffeine-elicited  $[Ca^{2+}]_i$  transients in the presence and absence of 5 mmol/L Ni<sup>2+</sup>.

Patch-clamp experiments were conducted with an Axoclamp 2B amplifier (Axon Instruments, Foster City, CA, USA), pCLAMP software (Axon Instruments), and low resistance pipettes (1-2 M $\Omega$ ). APs were triggered by injecting a 3-ms depolarizing current in cells patch-clamped with a pipette solution containing (in mmol/L): 120 K-aspartate, 0.5 MgCl<sub>2</sub>, 6 NaCl, 0.06 EGTA, 10 HEPES, 10 glucose, 25 KCl, and 4 K<sub>2</sub>-ATP (pH 7.2). L-type Ca<sup>2+</sup> current was elicited by 200 ms voltage steps from -50 mV to a range of potentials, with an internal solution containing (in mmol/L) 130 CsCl, 0.33 MgCl<sub>2</sub>, 4 Mg-ATP, 0.06 EGTA, 10 HEPES, and 20 TEA, and an extracellular solution containing (in mmol/L) 20 CsCl, 1 MgCl<sub>2</sub>, 135 NaCl, 10 Hepes, 10 D-glucose, 4 4-aminopyridine, and 1 CaCl<sub>2</sub> (1, 3). Na<sup>+</sup>/K<sup>+</sup>-ATPase (NKA) currents were obtained by elevating extracellular  $[K^+]$  from 0 mmol/L to 5.4 mmol/L, and contributions of the  $\alpha_1$  and  $\alpha_2$  NKA isoforms were distinguished based on differential sensitivity to ouabain blockade (3, 8).

Intracellular  $[Na^+]_i$  was assessed in cells loaded with SBFI AM (Invitrogen Molecular Probes, Eugene, OR, USA) using whole-cell photometry, and the fluorescence signal was calibrated to obtain  $[Na^+]_i$  levels as described previously (8). Intracellular pH was determined by confocal microscopy in

cells loaded with SNARF-1 AM (Invitrogen). SNARF was excited at 543 nm, and pH was calculated from the ratio of fluorescence at 580 and 640 nm using a calibration curve obtained in permeabilized cells.

## Statistics

Cardiomyocyte data are expressed as mean values  $\pm$  SEM. Statistical significance was calculated using paired or unpaired t-tests, and P values  $<0.05$  were considered significant.

## Model Implementation

### Justification for the addition of a subsarcolemmal compartment

Previously, we presented a mathematical modelling study of  $\text{Ca}^{2+}$  dynamics in the FF and 4-week KO cardiomyocytes (9). In that study, the FF and 4-week KO models were developed using a framework (10) which does not include the sub-sarcolemmal compartment and will be referred to as the lumped framework (the cytosolic and sub-sarcolemmal spaces were lumped into one cytosolic space). In the lumped framework, all transmembrane currents are uniformly distributed and most  $\text{Ca}^{2+}$  handling proteins such as NCX and PMCA are regulated by cytosolic  $\text{Ca}^{2+}$  concentration. This framework enabled parameterization of  $\text{Ca}^{2+}$  handling mechanisms as explicit functions of  $[\text{Ca}^{2+}]_i$  and simulated  $\text{Ca}^{2+}$  dynamics were found to be in good agreement with experimental observations. However, during parameterization of the 7-week KO model, the simulated  $[\text{Ca}^{2+}]_i$  transient using the lumped framework was significantly higher than experimental measurements. We then carried out detailed calculations of  $\text{Ca}^{2+}$  influx and efflux combined with thermodynamics consideration of NCX function as presented below. Such analysis revealed that, while it is sufficient to model the FF and 4-week KO using the lumped framework, a more detailed model of  $\text{Ca}^{2+}$  handling with a sub-sarcolemmal space was required to model the 7-week KO.

During a  $[\text{Ca}^{2+}]_i$  transient, peak  $[\text{Ca}^{2+}]_i$  is reached within approximately 40 ms and the size of a  $[\text{Ca}^{2+}]_i$  transient ( $\Delta[\text{Ca}^{2+}]_i$ ) is determined by the net  $\text{Ca}^{2+}$  influx during this initial period as well as intracellular  $\text{Ca}^{2+}$  buffering properties. The net  $\text{Ca}^{2+}$  influx can in turn be calculated as the difference between total  $\text{Ca}^{2+}$  entry through LCCs and SR  $\text{Ca}^{2+}$  release, and  $\text{Ca}^{2+}$  removal through SERCA, NCX and PMCA. In the FF cardiomyocytes, assuming most of the  $\text{Ca}^{2+}$  entry and SR  $\text{Ca}^{2+}$  release occur within the first 40 ms of the cardiac cycle,  $\text{Ca}^{2+}$  entry through LCCs could be estimated from the integral of the LCC current ( $I_{\text{CaL}}$ ) recorded during an AP clamp (0.096 pC/pF), yielding approximately 3.3  $\mu\text{mol/L}$  of  $\text{Ca}^{2+}$ . SR  $\text{Ca}^{2+}$  release could be estimated from the integral of SR  $\text{Ca}^{2+}$  uptake since  $\text{Ca}^{2+}$  release and uptake must be balanced over each cardiac cycle. Using the experimentally recorded  $[\text{Ca}^{2+}]_i$  transient and fitted parameter values for SERCA to approximate and integrate the time course of  $\text{Ca}^{2+}$  uptake, the estimated total SR  $\text{Ca}^{2+}$  release and SR  $\text{Ca}^{2+}$  uptake during the first 40 ms were 37.7 and 4.4  $\mu\text{mol/L}$ , respectively, yielding a net SR  $\text{Ca}^{2+}$  release of 33.3  $\mu\text{mol/L}$ . Therefore, without taking into account of  $\text{Ca}^{2+}$  extrusion through NCX and PMCA during the first 40 ms, the net  $\text{Ca}^{2+}$  influx had an estimated value of 36.6  $\mu\text{mol/L}$ .

On the other hand, given the observed  $[\text{Ca}^{2+}]_i$  transient in the FF cardiomyocytes, the actual increase in the total concentration of  $\text{Ca}^{2+}$  ( $\Delta[\text{Ca}^{2+}]_{\text{tot}}$ ) can be calculated as:

$$\Delta[\text{Ca}^{2+}]_{\text{total}} = \left( \frac{B_{\text{max}} \cdot [\text{Ca}^{2+}]_p}{K_d + [\text{Ca}^{2+}]_p} + [\text{Ca}^{2+}]_p \right) - \left( \frac{B_{\text{max}} \cdot [\text{Ca}^{2+}]_d}{K_d + [\text{Ca}^{2+}]_d} + [\text{Ca}^{2+}]_d \right) \quad (1)$$

where  $B_{\text{max}}$  and  $K_d$  denote the total concentration and  $\text{Ca}^{2+}$  affinity of buffers, respectively.  $[\text{Ca}^{2+}]_p$  and  $[\text{Ca}^{2+}]_d$  are the peak and diastolic  $[\text{Ca}^{2+}]_i$ , respectively. With a diastolic  $[\text{Ca}^{2+}]_i$  of  $0.113 \pm 0.025$   $\mu\text{mol/L}$ , a  $\Delta[\text{Ca}^{2+}]_i$  of  $0.343 \pm 0.065$   $\mu\text{mol/L}$ , and estimated  $B_{\text{max}}$  and  $K_d$  values of 109 and 0.6  $\mu\text{mol/L}$ , respectively,  $\Delta[\text{Ca}^{2+}]_{\text{tot}}$  was calculated to be between 24.3 and 35.4  $\mu\text{mol/L}$ . The above calcu-

lations demonstrated that the net  $\text{Ca}^{2+}$  influx, without taking into account of  $\text{Ca}^{2+}$  extrusion, was close to the actual  $\Delta[\text{Ca}^{2+}]_{\text{tot}}$  required. This makes it possible to use the lumped model framework for the FF model, in which NCX and PMCA sense cytosolic  $\text{Ca}^{2+}$  concentration and only a small amount of  $\text{Ca}^{2+}$  extrusion occurs during the first 40 ms.

Similar calculations were carried out with the 4-week and 7-week KO data. It was found that, in the 4-week KO, the net  $\text{Ca}^{2+}$  influx (13.7  $\mu\text{mol/L}$ ) was close to the actual  $\Delta[\text{Ca}^{2+}]_{\text{tot}}$  (7.63 - 13.62  $\mu\text{mol/L}$ ). However, this was not the case for the 7-week KO, in which there was a significant mismatch between net  $\text{Ca}^{2+}$  influx (13.87  $\mu\text{mol/L}$ ) and  $\Delta[\text{Ca}^{2+}]_{\text{tot}}$  required (5.09 - 7.38  $\mu\text{mol/L}$ ), suggesting additional  $\text{Ca}^{2+}$  removal through trans-sarcolemmal  $\text{Ca}^{2+}$  extrusion.

$\text{Ca}^{2+}$  extrusion through NCX is thermodynamically favoured when the Nernst potential of the exchanger ( $E_{\text{NCX}}$ ) is more positive than the transmembrane potential ( $V_m$ ).  $E_{\text{NCX}}$  is in turn governed by the equilibrium potentials for  $\text{Ca}^{2+}$  ( $E_{\text{Ca}}$ ) and  $\text{Na}^+$  ( $E_{\text{Na}}$ ). When the lumped framework was used,  $E_{\text{NCX}}$  could be calculated as:

$$\begin{aligned} E_{\text{NCX}} &= 3E_{\text{Na}} - 2E_{\text{Ca}} \\ E_{\text{Na}} &= \frac{RT}{F} \cdot \ln \frac{[\text{Na}^+]_o}{[\text{Na}^+]_i} \\ E_{\text{Ca}} &= \frac{RT}{2F} \cdot \ln \frac{[\text{Ca}^{2+}]_o}{[\text{Ca}^{2+}]_i} \end{aligned} \quad (2)$$

where  $R$  is the universal gas constant (8.314  $\text{J}\cdot\text{mol}^{-1}\cdot\text{K}^{-1}$ ),  $T$  is the absolute temperature (310 K),  $[\text{Ca}^{2+}]_o$ ,  $[\text{Ca}^{2+}]_i$ ,  $[\text{Na}^+]_i$  and  $[\text{Na}^+]_o$  are the intra- and extra-cellular ion concentrations. Using the experimentally measured  $[\text{Na}^+]_i$  levels and  $[\text{Ca}^{2+}]_i$  transients,  $E_{\text{Na}}$  and  $E_{\text{Ca}}$  during the first 40 ms of the cardiac cycle were estimated, as shown in Fig. S1A, for the FF, 4-week KO and 7-week KO. It can be seen that  $E_{\text{Na}}$  was similar between the FF and 4-week KO, but decreased significantly in the 7-week KO compared to the FF level, due to the 5 mmol/L elevation in  $[\text{Na}^+]_i$ . On the other hand, the decrease in the  $[\text{Ca}^{2+}]_i$  transient led to a gradual rise in  $E_{\text{Ca}}$ . The resulting  $E_{\text{NCX}}$  and APs reconstructed from the average recorded APDs ( $\text{APD}_{20}$ ,  $\text{APD}_{50}$  and  $\text{APD}_{70}$ ) are shown in Fig. S1B. The shaded areas where  $E_{\text{NCX}}$  is below  $V_m$  indicate the duration of NCX in reverse mode. For the FF and 4-week KO, NCX operated in forward  $\text{Ca}^{2+}$  extrusion mode during most of the 40 ms. However, for the 7-week KO, NCX operated in reverse mode during most of the 40 ms, as a result of both the decrease in  $E_{\text{NCX}}$  and the prolonged AP. This meant that using the lumped framework, there was little  $\text{Ca}^{2+}$  extrusion during the first 40 ms of the cardiac cycle as governed by the thermodynamics of the exchanger, such that total  $\text{Ca}^{2+}$  influx exceeded the actual  $\Delta[\text{Ca}^{2+}]_{\text{tot}}$ . As a result, simulated  $[\text{Ca}^{2+}]_i$  transient would inevitably be greater than that observed experimentally.

The above analysis thus motivated the addition of subsarcolemmal space, so the transmembrane proteins sense ion concentrations in their respective sub-spaces. In this framework,  $[\text{Ca}^{2+}]_i$  transient in the 7-week KO can be accurately matched as  $[\text{Ca}^{2+}]_{\text{jc}}$  and  $[\text{Ca}^{2+}]_{\text{sl}}$  rise much faster and higher than  $[\text{Ca}^{2+}]_i$  thus driving NCX into the  $\text{Ca}^{2+}$  extrusion mode much earlier (see Fig.S2).

A subsarcolemmal compartment was thus incorporated into the previously developed mathematical framework of  $\text{Ca}^{2+}$  dynamics and APs in murine ventricular myocytes (10), following the approach of Shannon et al. (11). Such addition allowed differentially distributed proteins in the cell membrane to sense ion concentrations in their respective sub-spaces that could be substantially different from the bulk cytosolic concentrations during an AP, as shown in Fig. S2. Since the formulation of Shannon et al. (11) was originally developed for rabbit ventricular myocytes, some modifications were made based on experimental data from mice and rats. These include changes to the geometrical parameters, diffusion parameters and distribution of the ion channels, as explained below.

## Geometrical considerations

The cell membrane was divided into two areas: the junctional membrane ( $A_{jc}$ ), i.e. the area occupied by transverse tubules (T-tubules), and the surface sarcolemmal area ( $A_{sl}$ ). The percentage area of the junctional membrane was determined based on a study by Page and Surdyk-Droske (12), which showed that in the mouse heart, on average 6% of the surface sarcolemma and 40% of the T-tubules are involved in junctional complexes. As a result, 19% of the cell membrane is junctional, with approximately 80% of which located in the T-tubules. Therefore, in our model the percentage area of the junctional membrane was set to 19%. For the differential distributions of the channels such as NCX and NKA (see later), we have assumed that their maximal conductances in the junctional membrane are the same as those measured in the T-tubules, since the majority of the junction complexes are located in the T-tubules. Similarly, we have also assumed that the maximal conductances of these channels in the surface sarcolemma are the same as those measured in detubulated membranes, since the majority of the surface sarcolemma is not in the T-system.

The cell volume ( $2.2 \times 10^{-5}$   $\mu\text{L}$ ) (13) was separated into five compartments, four of which (junctional space (jc or dyadic space ds), junctional SR (JSR), network SR (NSR) and the cytosolic space (cyt)) have been described previously (10). An additional subsarcolemmal space (sl), located directly underneath the surface sarcolemma area and occupying 2% of the cell volume, was added to the model.

### Diffusion parameters

Following the approach of Shannon et al. (11), the rate of diffusion of ions ( $\text{Na}^+$  and  $\text{Ca}^{2+}$ ) from space jc to space sl was defined as:

$$J_{I_{jcsl}} = D_{I_{jcsl}} \cdot A_{jcsl} \cdot \frac{[I]_{jc} - [I]_{sl}}{\Delta x_{jcsl}} \quad (3)$$

where  $D_{I_{jcsl}}$  is the diffusion coefficient for the ion,  $A_{jcsl}$  is the interface area between the junction space and the subsarcolemmal space,  $\Delta x_{jcsl}$  is the distance between the centres of the two compartments, and  $[I]_{jc} - [I]_{sl}$  is the difference in ion concentrations.

Similarly, the rate of diffusion of ions from space sl to space cyt was defined as:

$$J_{I_{slcyt}} = D_{I_{slcyt}} \cdot A_{slcyt} \cdot \frac{[I]_{sl} - [I]_i}{\Delta x_{slcyt}} \quad (4)$$

The diffusion coefficients for  $\text{Na}^+$  and  $\text{Ca}^{2+}$  ions in equations 3 and 4 were set to the same values as those in the Shannon et al. model (11), as listed in Table S3. The diffusion distances and interface areas were adjusted from the values used by Shannon et al., according to the differences in geometry, as explained below.

Each junction was considered to be a disk with a radius of 0.16  $\mu\text{m}$  with a height of 0.015  $\mu\text{m}$  (11). The cross-sectional area is therefore 0.08  $\mu\text{m}^2$ . Given that  $A_{jc}$  is equal to 2800  $\mu\text{m}^2$  (19% of  $A_{tot}$ ), the total number of junctions is thus approximately 35150. This yielded an even spacing of 0.986  $\mu\text{m}$  between junctions, which is 18% smaller compared to the 1.2  $\mu\text{m}$  spacing in the Shannon et al. model. Therefore, the distance of diffusion to the middle of the SL compartment was reduced by 35% from 0.5 to 0.41  $\mu\text{m}$  (See Fig 1.B in ref. (11)). The side area of a junction is 0.015  $\mu\text{m}^2$ , giving a total interface area of  $5.27 \times 10^{-6}$   $\text{cm}^2$  for diffusion from junctional space to subsarcolemmal space.

The distance of diffusion from the subsarcolemmal space to the cytosol was kept unchanged from the value used by Shannon et al. (0.45  $\mu\text{m}$ ), and the interface area was approximated by the area of the surface sarcolemma ( $1.2 \times 10^{-4}$   $\text{cm}^2$ , 81% of  $A_{tot}$ ).

The addition of the subsarcolemmal compartment with the aforementioned  $\text{Ca}^{2+}$  diffusion parameters resulted in an approximately ten-fold increase in the magnitude of  $[\text{Ca}^{2+}]_{jc}$ , compared to the lumped model. However, cooperative binding of  $\text{Ca}^{2+}$  to RyR with a hill coefficient of 4 for transition from state  $C_1$  to state  $O_1$  and 3 for transition from state  $O_1$  to state  $O_2$  in the model meant that the resulting forward rate constants would be approximately  $10^4$  and  $10^3$  times faster, respectively. This resulted in a significantly prolonged opening time of the RyRs and instability of the model (the proportion of RyRs in state C dropped transiently to just below zero in some simulations). We therefore adjusted the

Ca<sup>2+</sup>-sensitivity of the RyR to ensure the proper functioning of the channel, as suggested by Jafri et al. (14).

K<sup>+</sup> ion dynamics were not compartmentalized, following the approach of Shannon et al. (11).

### Differential distribution of transmembrane ion channels

In adult mouse heart, two isoforms of the Na<sup>+</sup>/K<sup>+</sup>-ATPase  $\alpha$ -subunit ( $\alpha_1$  and  $\alpha_2$ ) have been found, which are distributed differentially in the T-tubule and surface sarcolemmal membranes. In the study by Berry et al. (15), preferential inhibition of the high ouabain affinity  $\alpha_2$  subunits in control and detubulated mouse ventricular myocytes revealed that the current densities of  $I_{NKA,\alpha_1}$  and  $I_{NKA,\alpha_2}$  in the T-tubules are 1.37 and 5.57 times greater, respectively, than those in the surface sarcolemma. In our model,  $I_{NKA,\alpha_1}$  and  $I_{NKA,\alpha_2}$  were computed separately, and the data by Berry et al. (15) were used to define the maximum  $I_{NKA,\alpha_1}$  and  $I_{NKA,\alpha_2}$  in the junctional and sarcolemma areas in the model ( $I_{NKA,\alpha_1}^{\max}(jc) = 1.276 \cdot I_{NKA,\alpha_1}^{\max}$ ,  $I_{NKA,\alpha_1}^{\max}(sl) = 0.931 \cdot I_{NKA,\alpha_1}^{\max}$ ,  $I_{NKA,\alpha_2}^{\max}(jc) = 2.98 \cdot I_{NKA,\alpha_2}^{\max}$ ,  $I_{NKA,\alpha_2}^{\max}(sl) = 0.535 \cdot I_{NKA,\alpha_2}^{\max}$ ).

The current density of NCX in the junctional membrane was found to be three times greater than that in the surface sarcolemma, based on  $I_{NCX}$  measurements from detubulated rat ventricular myocytes (16). Yang et al. (17) also found very little NCX current in detubulated rat ventricular myocytes, indicating the majority of the channels are located on the T-tubules. Therefore, the maximum NCX activity on the junctional membrane was set to be three times greater than on the surface sarcolemma ( $V_{NCX}^{\max}(jc) = 2.175 \cdot V_{NCX}^{\max}$ ,  $V_{NCX}^{\max}(sl) = 0.725 \cdot V_{NCX}^{\max}$ ).

The distribution of LCCs has been assessed by Scriven et al. (18) in rat ventricular myocytes. Using indirect immunofluorescence, it was found that the majority of the LCCs are located on the T-tubules, with very little immunolabelling on the surface sarcolemma. In another study in rat ventricular myocytes (19), detubulation revealed that LCC density is 8.7 times greater on the T tubules than on the surface membrane ( $P_{CaL}(sl) = 0.1 \cdot P_{CaL}(jc)$ ). Therefore, in our model, the permeability of the channels on the junctional membrane is nine times greater than on the surface sarcolemma. It was also assumed in the model that, Ca<sup>2+</sup>-induced-Ca<sup>2+</sup> release is only triggered by Ca<sup>2+</sup> entry through the LCCs located on the junctional membrane.

The distribution of the fast Na<sup>+</sup> channels on the cell membrane was assumed to be uniform in our model, consistent with the observations by two different groups (20, 17), both in rat ventricular myocytes. The distribution of plasmamembrane Ca<sup>2+</sup> ATPase (PMCA) is currently unknown, although Ca<sup>2+</sup> extrusion through PMCA was found to be present in detubulated rat ventricular myocytes (17). This protein was thus assumed to be uniformly distributed on the cell membrane. Relatively few studies have been carried out on the distribution of K<sup>+</sup> channels, which were also assumed to be uniformly distributed.

### Buffering

Ca<sup>2+</sup> buffering parameters in the junctional space, cytosolic space and the SR were kept the same as those in our previous model (10). Buffering parameters for the additional subsarcolemmal space were the same as those used in the junctional and cytosolic spaces.

Experimental data on Na<sup>+</sup> buffering is sparse, although in one study (21) in rabbit ventricular myocytes Na<sup>+</sup> buffering capacity has been reported to be very low (approximately 1.3). In our model, Na<sup>+</sup> buffering was included following the same formulations and parameter values as those in the Shannon et al. model (11).

### Model Parameterization

#### The Na<sup>+</sup>/K<sup>+</sup>-ATPase (FF and 4-week KO)

In the current study,  $I_{NKA}$  in the FF and 7-week KO cardiomyocytes were measured in dialyzed cells

( $[\text{Na}^+]_i = 50 \text{ mmol/L}$ ) under whole-cell voltage clamping at  $-50 \text{ mV}$  holding potential. The current was activated by switching from a  $\text{K}^+$ -free to  $\text{K}^+$ -containing external solution ( $5.4 \text{ mmol/L } [\text{K}^+]_o$ ), and  $I_{\text{NKA},\alpha_1}$  and  $I_{\text{NKA},\alpha_2}$  were differentiated using ouabain which blocks the  $\alpha_2$  isoform.

Before fitting the NKA formulations to our  $I_{\text{NKA}}$  measurements, a range of existing experimental data from mice, and in some cases rats, were used to define the voltage- and  $[\text{Na}^+]_i$ -dependent properties of the current. The voltage-dependence of  $I_{\text{NKA},\alpha_1}$  and  $I_{\text{NKA},\alpha_2}$  was parameterized to experimental measurements by Swift et al. (8) in rat ventricular myocytes at  $37^\circ\text{C}$ , as shown in Fig. S3. The activation of NKA by intracellular  $\text{Na}^+$  has been studied by various groups, and a wide range of values for the affinity constant ( $K_m$ ) have been reported. For example, the mean  $K_m$  values for rat ventricular myocytes at physiological temperatures range from  $10.2 \text{ mmol/L}$  (21),  $17.0 \text{ mmol/L}$  (16) to  $40 \text{ mmol/L}$  (22). These differences may, at least partially, be explained by variations in actual subsarcolemmal  $[\text{Na}^+]_i$  which may not always be accurately controlled by the  $[\text{Na}^+]_i$  in the pipette solution. In normal mouse ventricular myocytes, Berry et al. (15) measured total,  $\alpha_1$  and  $\alpha_2$ -mediated  $\text{Na}^+$  effluxes as a function of  $[\text{Na}^+]_i$  at  $35^\circ\text{C}$ . The  $\text{Na}^+$  affinity of the total NKA function was equal to  $16.6 \pm 0.2 \text{ mmol/L}$  with similar  $K_m$  values for the  $\alpha_1$  and  $\alpha_2$  subunits ( $16.6 \pm 0.8$  and  $16.7 \pm 2.6 \text{ mmol/L}$ , respectively). The hill coefficient (nh) of total NKA function was equal to  $2.3 \pm 0.1$ , with values of  $2.3 \pm 0.1$  and  $4.1 \pm 0.8$ , for the  $\alpha_1$  and  $\alpha_2$  subunits, respectively. In another study, Han et al. (23) reported a  $K_m$  of  $18.3 \pm 2.7 \text{ mmol/L}$  and an nh of  $2.8 \pm 0.2$  for the overall NKA function in mouse ventricular myocytes at room temperature.

Based on the experimental evidence above, the  $K_m$  and nh values for the  $\alpha_1$  and  $\alpha_2$  subunits were set to be equal in the FF model. Various combinations of  $K_m$  and nh values within the range of experimental data were then tested in whole cell simulations and the resulting  $[\text{Na}^+]_i$  levels compared with experimentally observed level in FF cardiomyocytes ( $[\text{Na}^+]_i = 9.6 \pm 1.4 \text{ mmol/L}$ ). For each combination, we first parameterized  $I_{\text{NKA},\alpha_1}^{\text{max}}$  and  $I_{\text{NKA},\alpha_2}^{\text{max}}$  based on our measurements of  $I_{\text{NKA},\alpha_1}$  ( $2.61 \pm 0.10 \text{ pA/pF}$ ) and  $I_{\text{NKA},\alpha_2}$  ( $0.81 \pm 0.09 \text{ pA/pF}$ ) in dialyzed cells at  $-50 \text{ mV}$ . The models of  $\alpha_1$  and  $\alpha_2$  NKA isoforms were then incorporated into the previously developed model framework (10) for simulations of  $[\text{Na}^+]_i$  under field-stimulations at  $1 \text{ Hz}$ . As shown in Fig. S4, experimentally measured  $[\text{Na}^+]_i$  value was only matched with high nh and high  $K_m$  values. For this reason, we set nh to 3 and  $K_m$  to  $21 \text{ mmol/L}$  in our model, with fitted  $I_{\text{NKA},\alpha_1}^{\text{max}}$  and  $I_{\text{NKA},\alpha_2}^{\text{max}}$  equal to  $5.2$  and  $1.95 \text{ pA/pF}$ , respectively. NKA parameters for the 4-week KO model were kept identical to those in the FF model.

### The $\text{Na}^+/\text{K}^+$ -ATPase (7-week KO)

In 7-week KO cardiomyocytes,  $I_{\text{NKA},\alpha_1}$  and  $I_{\text{NKA},\alpha_2}$  during voltage-clamp experiments were decreased from their FF values of  $2.61 \pm 0.10$  and  $0.81 \pm 0.09 \text{ pA/pF}$ , respectively, to  $2.35 \pm 0.10$  and  $0.45 \pm 0.06 \text{ pA/pF}$ , respectively. At the same time,  $[\text{Na}^+]_i$  level during  $1 \text{ Hz}$  field-stimulation was also higher ( $14.6 \pm 1.1 \text{ mmol/L}$ ) compared to the FF ( $9.6 \pm 1.4 \text{ mmol/L}$ ), which was initially thought to result only from NKA down-regulation. However, when  $I_{\text{NKA},\alpha_1}^{\text{max}}$  and  $I_{\text{NKA},\alpha_2}^{\text{max}}$  were fitted to experimental measurements ( $I_{\text{NKA},\alpha_1}^{\text{max}}$  (7-week KO) =  $4.4 \text{ pA/pF}$  and  $I_{\text{NKA},\alpha_2}^{\text{max}}$  (7-week KO) =  $0.9 \text{ pA/pF}$ ), simulated  $[\text{Na}^+]_i$  under  $1 \text{ Hz}$  field-stimulations was increased by about  $2 \text{ mmol/L}$  compared to the FF value, as shown in Fig. S4.

$\text{Na}^+$  accumulation in HF has been associated with increases in  $\text{Na}^+$  influx such as the persistent  $\text{Na}^+$  current in some studies. We thus used our model to test whether increases in the fast and persistent  $\text{Na}^+$  currents can explain the additional increase in  $[\text{Na}^+]_i$  seen in the KO. With  $J_{\text{acid}} = 0 \text{ }\mu\text{M/ms}$ , the conductivity of the fast  $\text{Na}^+$  current ( $G_{\text{Na}}$ ) was increased from its original value of  $16 \text{ pA/pF}$  to a maximum value of  $23 \text{ pA/pF}$ .  $G_{\text{Na}}$  could not be increased beyond  $23 \text{ pA/pF}$  as the  $\text{Na}^+$  channel model includes both the fast and persistent channel kinetics (24), and the increased persistent current at higher  $G_{\text{Na}}$  values prevented the cell model from repolarising. At  $G_{\text{Na}} = 23 \text{ pA/pF}$ , simulated  $[\text{Na}^+]_i$  increased from  $12.25 \text{ mM}$  originally to  $12.77 \text{ mM}$  which was significantly below the experimental measurement ( $14.6 \pm 1.1 \text{ mM}$ ). On the other hand, the conductivity of the persistent  $\text{Na}^+$  current ( $G_{\text{Nab}}$ ) would need to be increased almost 3.5-fold from  $0.0026 \text{ pA/pF}$  to  $0.0085 \text{ pA/pF}$  in order to raise  $[\text{Na}^+]_i$  to the experimental level, which was significantly greater than the observed 30% increase in this current in canine HF (25). We have obtained some preliminary measurements on the fast and persistent  $\text{Na}^+$

currents, which suggest no significant increases in either the fast or the persistent  $\text{Na}^+$  currents.

We hypothesized two mechanisms could potentially explain the additional increases in  $[\text{Na}^+]_i$ . The first mechanism could be a decrease in the  $\text{Na}^+$  affinity of NKA (an increase in  $K_m$ ). This means a higher  $[\text{Na}^+]_i$  level would be required to achieve the same level of  $\text{Na}^+$  efflux, which should be equal to  $\text{Na}^+$  influx at steady state (21). The effect of  $K_m$  on  $[\text{Na}^+]_i$ , with NKA down-regulation kept at the experimentally observed levels, is shown in Fig. S5A, demonstrating an almost linear increase in  $[\text{Na}^+]_i$  with increasing  $K_m$ . Experimentally measured level of  $[\text{Na}^+]_i$  was matched with  $K_m$  equal to 29 mmol/L.

The second mechanism could be an increase in  $\text{Na}^+$  influx, possibly through mechanisms such as the fast  $\text{Na}^+$  channels, the persistent  $\text{Na}^+$  channels and the  $\text{Na}^+/\text{H}^+$  exchanger (NHE). However, since increases in fast and persistent  $\text{Na}^+$  currents were not observed experimentally (not shown), they were not considered as plausible explanations. On the other hand, increased  $\text{Na}^+$  influx through NHE due to a decreased  $\text{pH}_i$  (see Fig. S5B) could cause an  $[\text{Na}^+]_i$  increase to the experimentally observed level. This was later confirmed in our experiments, where a tendency towards acidosis was observed in KO cardiomyocytes ( $\text{pH}_i$ :  $6.91 \pm 0.07$  v.s.  $7.19 \pm 0.08$  in FF).

### Intracellular pH regulation

A previously developed model of intracellular pH regulation for rat ventricular myocytes (26) was introduced into the FF, 4-week and 7-week KO models. Fluxes through the  $\text{Na}^+$ /bicarbonate cotransporter and anion exchanger were set to zero in all three models, since all our experiments were conducted using bicarbonate-free external perfusion solutions containing HEPEs. Extracellular ion concentrations and pH were adjusted according to the experimental setup (see Materials and Methods). To fit the parameters for the  $\text{Na}^+/\text{H}^+$  exchanger (NHE), we made use of the fact that total  $\text{Na}^+$  influx and efflux per cardiac cycle must be balanced at steady state. Specifically, we first estimated the integral (over one cardiac cycle) of the  $\text{Na}^+$  efflux through NKA and  $\text{Na}^+$  influx through non-NHE channels in the FF and 7-week KO models by running the models, with  $[\text{Na}^+]_i$  set to be constant at the experimentally measured value (FF: 9.6 mmol/L, 7-week KO: 14.6 mmol/L) and with the parameterized  $\text{Ca}^{2+}$  handling components (outlined below). The integral of the  $\text{Na}^+$  influx through NHE in each model was then taken as the difference between the integrals of  $\text{Na}^+$  efflux and non-NHE  $\text{Na}^+$  influx. Since the rate of  $\text{Na}^+$  influx through NHE does not change significantly during each cardiac cycle, it could then be approximated from the calculated integral (FF model:  $0.0047 \mu\text{mol}\cdot\text{L}^{-1}\cdot\text{ms}^{-1}$  and 7-week KO model:  $0.051 \mu\text{mol}\cdot\text{L}^{-1}\cdot\text{ms}^{-1}$ ). Finally, the affinity of NHE to proton ( $K_i = 0.411 \mu\text{mol/L}$  in all three models) and the hill coefficient ( $nh = 2.905$  in all three models) were fitted to the above estimated  $\text{Na}^+$  influx rates, at the experimentally observed  $\text{pH}_i$  levels in the FF and 7-week KO models.

Intracellular acidosis in the 7-week KO model was induced by the introduction of an acid flux from an intracellular acid-producing source ( $J_{\text{acid}}$  was set to  $0.045 \mu\text{mol}\cdot\text{L}^{-1}\cdot\text{ms}^{-1}$ ), which could be attributed to compromised metabolism such as glycolysis. To maintain charge balance, an equal amount of intracellular anion flux ( $J_A$ ) was also introduced. Build-up of  $[\text{A}^-]_i$  was prevented by including a constant-field sarcolemmal flux extruding  $\text{A}^-$  from the cytosol which was taken into account when calculating changes in transmembrane potential. The membrane permeability to  $\text{A}^-$  was set to be  $1 \times 10^{-7} \text{ cm/s}$ , such that the electrogenic transmembrane flux of  $\text{A}^-$  did not result in a significant change in resting membrane potential. It was also assumed that the  $\text{A}^-$  ions extruded from the cell was rapidly transported away from the cell such that  $[\text{A}^-]_o$  was approximately zero.

### Parameterization of NCX, PMCA, SERCA and L-type calcium current

Previously, we described a method for parameterizing NCX, PMCA and SERCA directly using experimentally measured  $[\text{Ca}^{2+}]_i$  transients in the presence of caffeine and during field stimulations (10), provided that  $\text{Ca}^{2+}$  fluxes through NCX and PMCA are functions of cytosolic  $\text{Ca}^{2+}$  concentrations. In the current model, NCX and PMCA respond to sub-space (subsarcolemmal and junction spaces)  $\text{Ca}^{2+}$  concentrations. As a result, parameterization of NCX, PMCA and SERCA for the current model re-

quired solving a system of ordinary differential equations and matching the resulting decay of  $[Ca^{2+}]_i$  to that measured experimentally, as explained below.

Generally speaking, the dynamics of  $Ca^{2+}$  concentrations in the cytosolic ( $[Ca^{2+}]_i$ ), subsarcolemmal ( $[Ca^{2+}]_{sl}$ ) and junctional spaces ( $[Ca^{2+}]_{jc}$ ) during the later decay phase of a  $[Ca^{2+}]_i$  transient can be described as:

$$\frac{d[Ca^{2+}]_i}{dt} = B_i \cdot \left( \frac{J_{Ca,slcyt}}{V_{cyt}} - J_{SERCA} \right) \quad (5)$$

$$\frac{d[Ca^{2+}]_{sl}}{dt} = B_{sl} \cdot \left( -\frac{J_{Ca,slcyt}}{V_{sl}} + \frac{J_{Ca,jcsl}}{V_{sl}} + J_{Casl} \right) \quad (6)$$

$$\frac{d[Ca^{2+}]_{jc}}{dt} = B_{jc} \cdot \left( -\frac{J_{Ca,jcsl}}{V_{jc}} + J_{Ca,jc} \right) \quad (7)$$

where  $V_{cyt}$ ,  $V_{sl}$  and  $V_{jc}$  are the volumes of the cytosolic, subsarcolemmal and junctional spaces, respectively;  $J_{SERCA}$  is the rate of net uptake through SERCA;  $J_{Ca,jcsl}$  and  $J_{Ca,slcyt}$ , calculated according to Eqs. 3-4, are the rates of  $Ca^{2+}$  diffusion from junctional space to subsarcolemmal space, and from subsarcolemmal space to cytosol, respectively;  $J_{Casl}$  and  $J_{Ca,jc}$  are the total fluxes of  $Ca^{2+}$  across the surface sarcolemmal membrane and the junctional membrane, respectively. Finally,  $B_i$ ,  $B_{sl}$  and  $B_{jc}$  account for  $Ca^{2+}$  buffering in the cytosol, subsarcolemmal and junctional spaces and are calculated as:

$$B_i = \left( 1 + \frac{B_{max} \cdot K_d}{(K_d + [Ca^{2+}]_i)^2} \right)^{-1} \quad (8)$$

$$B_{sl} = \left( 1 + \frac{B_{max} \cdot K_d}{(K_d + [Ca^{2+}]_{sl})^2} \right)^{-1} \quad (9)$$

$$B_{jc} = \left( 1 + \frac{B_{max} \cdot K_d}{(K_d + [Ca^{2+}]_{sl})^2} \right)^{-1} \quad (10)$$

During the decay phase of a caffeine-induced  $[Ca^{2+}]_i$  transient,  $J_{SERCA}$  in Eq. 5 is equal to zero.  $J_{Casl}$  and  $J_{Ca,jc}$  are the sums of  $Ca^{2+}$  fluxes through NCX and PMCA located on the surface sarcolemma and junctional membrane, respectively, and taking into account a small background  $Ca^{2+}$  flux. Given initial values of  $[Ca^{2+}]_i$ ,  $[Ca^{2+}]_{sl}$  and  $[Ca^{2+}]_{jc}$ , Eqs. 5-7 can thus be solved to give the time course of decay of  $[Ca^{2+}]_i$ . The relative contributions of NCX and PMCA were calculated as the ratio between the integrals of the simulated  $J_{NCX}$  and  $J_{PMCA}$ .

For parameterization, initial  $[Ca^{2+}]_i$  was set equal to experimentally measured  $[Ca^{2+}]_i$  at 100 ms post-peak during the caffeine-induced  $[Ca^{2+}]_i$  transient. Initial  $[Ca^{2+}]_{sl}$  and  $[Ca^{2+}]_{jc}$  were first assumed to be equal to  $[Ca^{2+}]_i$ , assuming  $Ca^{2+}$  movement across the different compartments occur on a much faster time scale than  $Ca^{2+}$  removal fluxes. Maximum NCX activity ( $V_{NCX}^{max}$ ), the maximum  $Ca^{2+}$  extrusion activity through PMCA ( $I_{PMCA}^{max}$ ) and the  $Ca^{2+}$  affinity of PMCA ( $K_{m,PMCA}$ ) were parameterized to minimize the cost function, which takes into account both the difference between simulated and experimentally measured decay of  $[Ca^{2+}]_i$ , and the difference between the simulated and experimentally estimated contributions of NCX and PMCA. During fitting, the concentrations of  $[Na^+]$  in the different compartments were set to be equal to the experimentally measured cytosolic  $[Na^+]$  (FF and 4-week KO:  $[Na^+]_{jc} = [Na^+]_{sl} = [Na^+]_i = 9.6$  mmol/L, 7-week KO:  $[Na^+]_{jc} = [Na^+]_{sl} = [Na^+]_i = 14.6$  mmol/L).

During the decay phase of a field-stimulated  $[Ca^{2+}]_i$  transient at 1 Hz,  $J_{SERCA}$  in Eq. 5 is non-zero, and  $V_{NCX}^{max}$ ,  $I_{PMCA}^{max}$  and  $K_{m,PMCA}$  fitted from above were treated as constants in Eqs. 5-7. The experimentally measured decay of  $[Ca^{2+}]_i$  can thus be used to parameterize the maximum uptake rate of SERCA ( $V_{up}$ ), its  $Ca^{2+}$  affinity ( $K_{m,up}$ ), and the small SR  $Ca^{2+}$  leak flux ( $J_{leak}$ , assumed to be constant during fitting), with initial  $[Ca^{2+}]_i$ ,  $[Ca^{2+}]_{sl}$  and  $[Ca^{2+}]_{jc}$  set equal to the experimentally measured  $[Ca^{2+}]_i$  at 90 ms post-peak.

The above fitted NCX, PMCA and SERCA parameter values were then incorporated into the fitting of the L-type  $Ca^{2+}$  current, using the previously described approach (10). The conductance of the channel in the junctional membrane was set to be nine times higher than that in the sarcolemma, to be



consistent with experimentally observed differential expressions of the protein (18, 19). The integral of simulated  $I_{CaL}$  was 0.116, 0.225 and 0.263 pC/pF for the FF, 4-week KO and 7-week KO models, respectively, close to experimental values of  $0.111 \pm 0.009$ ,  $0.205 \pm 0.02$  and  $0.243 \pm 0.015$  pC/pF, respectively.

The assumption of equal initial  $Ca^{2+}$  concentrations in the subsarcolemmal, junctional and cytosolic spaces were then tested by incorporating the above parameter values into the whole-cell framework as shown in Fig S6 (A-B for FF, C-D for KO). It can be seen that during most of the decay phase of the simulated transients,  $[Ca^{2+}]_{jc}$  and  $[Ca^{2+}]_{sl}$  were not equal to, but were linearly related to  $[Ca^{2+}]_i$ . Interpolation of the linear relationship at the experimentally measured  $[Ca^{2+}]_i$  level thus would give a more accurate initial  $[Ca^{2+}]_{jc}$  and  $[Ca^{2+}]_{sl}$  values for parameterization. Table S1 shows the initially fitted parameter values with  $[Ca^{2+}]_{jc}$  and  $[Ca^{2+}]_{sl}$  assumed to be equal to  $[Ca^{2+}]_i$ , and then with interpolated  $[Ca^{2+}]_{jc}$  and  $[Ca^{2+}]_{sl}$  values.

A similar approach was used for parameterization of NCX, PMCA, SERCA and the L-type  $Ca^{2+}$  current in the KO model. Since caffeine-induced  $[Ca^{2+}]_i$  transient in the KO cardiomyocytes is very small in magnitude, we chose to use experimentally measured field-stimulated  $[Ca^{2+}]_i$  transient (0.5 Hz) in the presence of caffeine to parameterize NCX and PMCA for the KO. Table S1 compares the final fitted parameter values between the FF and the KO models.

During parameterization, the maximum uptake activity of SERCA ( $V_{up}$ ) was found to be decreased by 58 and 80% from the FF value, at the 4-week and 7-week time points, respectively. No difference was found in the affinity of SERCA to intracellular  $Ca^{2+}$  ( $K_{m,up}$ ), i.e. allowing  $K_{m,up}$  to change between the FF, 4 and 7-week models did not improve the quality of the fit. The maximum  $Ca^{2+}$  extrusion activity through PMCA ( $I_{PMCA}^{max}$ ) had 10% and 2-fold increases in the 4-week and 7-week models, respectively, and the maximum exchange rate of NCX ( $V_{NCX}^{max}$ ) had 43% and 5.5-fold increases in the 4-week and 7-week models, respectively, from the corresponding FF value. These values are comparable with experimentally observed progressive increase in the expression levels of NCX and PMCA (3).

### Sensitivity of $[Ca^{2+}]_i$ Transients, $[Na^+]_i$ and $pH_i$ to NHE Parameters

We tested the sensitivity of the simulated  $[Ca^{2+}]_i$  transients,  $[Na^+]_i$  and  $pH_i$  to the fitted NHE parameters ( $K_i = 0.411 \mu\text{mol/L}$ ,  $nh = 2.905$ ) as follows. Crampin and Smith (27) reported a  $K_i$  value of  $0.3436 \mu\text{mol/L}$  ( $pK_i = 6.464$ ) and an  $nh$  value of 3.18. These values are in comparison to the study of Swietach et al. (28), where  $K_i$  and  $nh$  were found to be  $0.417 \mu\text{mol/L}$  ( $pK_i = 6.38$ ) and 1.933 respectively. We therefore modified  $K_i$  and  $nh$  independently to these high and low values reported in literature in all three models, and compared simulated  $[Ca^{2+}]_i$  transients,  $[Na^+]_i$  and  $pH_i$  levels with those obtained previously using the fitted (control) values. The results, as shown in Fig. S7-S9, demonstrated that for all three models, simulated  $[Ca^{2+}]_i$  transients and  $[Na^+]_i$  were insensitive to both  $K_i$  and  $nh$  values, with only small changes associated with different parameter sets. Simulated  $pH_i$  changed moderately with changing  $K_i$  values, but remained within the bounds of experimentally measured average  $\pm$  standard error of mean (SEM). Simulated  $pH_i$  was most sensitive to the choice of  $nh$  value, such that decreasing  $nh$  led to a higher  $pH_i$  and vice versa. However, as the mechanisms underpinning  $Ca^{2+}$  and  $Na^+$  homeostasis was the central focus of our study, we conclude that the specific NHE parameters do not significantly influence our analysis.

### Differential Effects of NKA Down-regulation

In the addition to the aforementioned compensatory changes, NKA was also found to be down-regulated. Sensitivity analysis in Fig. S11 showed that under physiological conditions such as in the FF cardiomyocytes, moderate reductions in NKA activity may beneficial effects on systolic function by enhancing peak  $[Ca^{2+}]_i$  and the size of the  $[Ca^{2+}]_i$  transient. However, in the 7-week KO, the same level of reduction in NKA activity resulted in a greater increase in  $[Na^+]_i$  and parallel increase in both diastolic and systolic  $[Ca^{2+}]_i$ . While the net increase in the size of the transient was significantly attenuated thereby reducing the beneficial effect of NKA down-regulation on systolic function, the increase in diastolic

$[Ca^{2+}]_i$  may have detrimental effects on relaxation.

### External Work in the Heart

Following the approach by Suga et al. (29), the mechanical energy can be estimated from the pressure-volume (PV) loop of the heart which in turn was assumed to be rectangular. The following simple formulae were proposed by Suga et al.:

$$\text{Total work} = \text{external work} + \text{potential work} \quad (11)$$

$$\text{External work} = (\text{peak pressure} - \text{diastolic pressure}) \times \text{stroke volume} \quad (12)$$

$$\text{Potential work} = \frac{(\text{end diastolic volume} - \text{stroke volume}) \times (\text{peak pressure} - \text{diastolic pressure})}{2} \quad (13)$$

$$\text{Stroke volume} = \text{cardiac output} / \text{heart rate} \quad (14)$$

The end diastolic volume was estimated from left ventricular diastolic dimension and posterior wall diastolic thickness based on the following equation proposed by Troy et al. (30) assuming the shape of the left ventricle resembles an ellipsoid:

$$\text{LVCV} = 4/3\pi \frac{D_d}{2} \times \frac{D_d}{2} \times \frac{2D_d}{2} \quad (15)$$

$$\text{LV(C\&W)V} = 4/3\pi \left(\frac{D_d}{2} + \text{WT}_d\right) \times \left(\frac{D_d}{2} + \text{WT}_d\right) \times \left(\frac{2D_d}{2} + \text{WT}_d\right) \quad (16)$$

$$\text{LVWV} = \text{LV(C\&W)V} - \text{LVCV} \quad (17)$$

where LVCV denotes left ventricular chamber volume, LV(C&W)V denotes left ventricular chamber and wall volume and LVWV denotes left ventricular wall volume.  $D_d$  and  $\text{WT}_d$  are the left ventricular diastolic dimension and posterior wall diastolic thickness, respectively, measured from echocardiography.

As shown in Table S2, the total mechanical work by the heart in the FF, 4-week KO and 7-week KO were 4.9, 4.7 and 2.9 mmHg·ml/beat, respectively, equivalent to  $6.6 \times 10^{-4}$ ,  $6.3 \times 10^{-4}$  and  $3.9 \times 10^{-4}$  J/beat, respectively. Therefore, the total mechanical work was slightly reduced between FF and 4-week KO, and significantly reduced by 7 weeks.

On the other hand, simulated ATP consumption by ion transport was 38.1, 30.8, and 48.1  $\mu\text{M}/\text{beat}$ . Given that the volumes of the heart muscle for the FF, 4-week KO and 7-week KO are approximately 0.11, 0.12, 0.09 ml, respectively, and that roughly 75% of the heart is occupied by myocytes (31), the total amount of ATP consumed by the heart for ion transport can be calculated to be  $3.0 \times 10^{-3}$ ,  $2.8 \times 10^{-3}$  and  $3.2 \times 10^{-3}$   $\mu\text{mole}/\text{beat}$ , which in turn are equivalent to  $1.5 \times 10^{-4}$ ,  $1.4 \times 10^{-4}$  and  $1.6 \times 10^{-4}$  J/cycle, assuming 50 kJ/mol ATP (32).

The above analysis revealed that the energy consumption for ion transport in the FF, 4-week KO and 7-week KO are 23%, 22% and 41% of mechanical work, respectively. This indicated that although the sum of mechanical work and work for electrophysiology decreased from FF to 7-week KO, the overhead of running the heart doubled as a fraction of the output energy.

### Effect of increased membrane area in 7-week KO

As mentioned previously (3), LV hypertrophy was not observed in either the 4-week or the 7-week KO animals. Unpublished data have, however, suggested an increase in the total surface area in the 7-week KO, which resulted from increased T-tubule density. Specifically, there appeared to be newly grown longitudinal T-tubules that contained NCX but not LCCs, while transverse T-tubule organization was maintained. Since the functional roles of these new structures are still not clear, we have not included them in the 7-week KO models.

Based on the reasons above, we have kept the volume and total membrane area unchanged in the 7-week KO model. However, we have tested the effect of an increased membrane area to make sure it does not significantly alter our simulation results. To do this, we have assumed the increase in the total membrane area is due to increased sarcolemmal membrane ( $A_{sl}$ ), while the area of junctional membrane ( $A_{jc}$ ) remains unchanged based on the experimental observation that the new T-tubules did not contain CaV1.2 channels (LCCs). In addition, we have adjusted the maximal activities of NCX, NKA and LCCs in the different membranes such that the overall currents are the same as those observed experimentally.

Simulated  $Ca^{2+}$  dynamics are not significantly different from those obtained previously. Simulated total ATP consumption by ion transport was slightly increased, as shown in Fig. S12, due to a slightly greater consumption by NKA as the increase in  $A_{sl}$  resulted in an increase in simulated ion flux through NKA. The overall trend is still consistent with our previous conclusion that ATP consumption by ion transport is greater in the 7-week KO model than in the FF and 4-week KO models. The aforementioned increase in NKA activity also caused a slight 4% decrease in simulated  $[Na^+]_i$  (13.8 mmol/L), which was still within the experimentally measured mean  $\pm$  SEM ( $14.6 \pm 1.1$  mmol/L). The effects of compensatory changes on ATP consumption also followed the same qualitative trend as that obtained previously with unchanged membrane area, as shown in Fig. S13. We therefore concluded that the possible increase in the membrane area in the 7-week KO is unlikely to have a significantly effect on the main conclusions of our study.

## References

- [1] Andersson, K. B., J. A. K. Birkeland, A. V. Finsen, W. E. Louch, I. Sjaastad, Y. Wang, J. Chen, J. D. Molkentin, K. R. Chien, O. M. Sejersted, and G. Christensen. 2009. Moderate heart dysfunction in mice with inducible cardiomyocyte-specific excision of the *Serca2* gene. *J Mol Cell Cardiol.* 47:180–187.
- [2] Andersson, K. B., L. H. Winer, H. K. Mørk, J. D. Molkentin, and F. Jaisser. 2009. Tamoxifen administration routes and dosage for inducible Cre-mediated gene disruption in mouse hearts. *Transgenic Res.* .
- [3] Louch, W. E., K. Hougen, H. K. Mork, F. Swift, J. M. Aronsen, I. Sjaastad, H. M. Reims, B. Roald, K. B. Andersson, G. Christensen, and O. M. Sejersted. 2010. Sodium accumulation promotes diastolic dysfunction in end-stage heart failure following *Serca2* knockout. *J Physiol.* 588:465–478.
- [4] Andersson, K. B., A. V. Finsen, C. Sjaland, L. H. Winer, I. Sjaastad, A. Ødegaard, W. E. Louch, Y. Wang, J. Chen, K. R. Chien, O. M. Sejersted, and G. Christensen. 2009. Mice carrying a conditional *Serca2*<sup>flox</sup> allele for the generation of Ca<sup>2+</sup> handling-deficient mouse models. *Cell Calcium.* 46:219–225.
- [5] Louch, W. E., J. Hake, G. F. Jølle, H. K. Mørk, I. Sjaastad, G. T. Lines, and O. M. Sejersted. 2010. Control of Ca<sup>2+</sup> release by action potential configuration in normal and failing murine cardiomyocytes. *Biophys J.* 99:1377–1386.
- [6] Mørk, H. K., I. Sjaastad, J. B. Sande, M. Periasamy, O. M. Sejersted, and W. E. Louch. 2007. Increased cardiomyocyte function and Ca<sup>2+</sup> transients in mice during early congestive heart failure. *J Mol Cell Cardiol.* 43:177–186.
- [7] Mørk, H. K., I. Sjaastad, O. M. Sejersted, and W. E. Louch. 2009. Slowing of cardiomyocyte Ca<sup>2+</sup> release and contraction during heart failure progression in postinfarction mice. *Am J Physiol Heart Circ Physiol.* 296:H1069–H1079.
- [8] Swift, F., N. Tovsrud, U. H. Enger, I. Sjaastad, and O. M. Sejersted. 2007. The Na<sup>+</sup>/K<sup>+</sup>-ATPase  $\alpha_2$ -isoform regulates cardiac contractility in rat cardiomyocytes. *Cardiovasc Res.* 75:109–117.
- [9] Li, L., W. E. Louch, S. A. Niederer, K. B. Andersson, G. Christensen, O. M. Sejersted, and N. P. Smith. 2010. Calcium dynamics in the ventricular myocytes of SERCA2 KO mice: a modelling study. *Biophys J.* 100:332–331.
- [10] Li, L., S. A. Niederer, W. Idigo, Y. H. Zhang, P. Swietach, B. Casadei, and N. P. Smith. 2010. A mathematical model of the murine ventricular myocyte: a data-driven biophysically based approach applied to mice overexpressing the canine NCX isoform. *Am J Physiol Heart Circ Physiol.* 299:H1045–1063.
- [11] Shannon, T. R., F. Wang, J. Puglisi, C. Weber, and D. M. Bers. 2004. A mathematical treatment of integrated Ca dynamics within the ventricular myocyte. *Biophys J.* 87:3351–3371.
- [12] Page, E., and M. Surdyk-Droske. 1979. Distribution, surface density, and membrane area of diadic junctional contacts between plasma membrane and terminal cisterns in mammalian ventricle. *Circulation Research.* 45:260–267.
- [13] O’Connell, T. D., S. Ishizaka, A. Nakamura, P. M. Swigart, M. Rodrigo, G. L. Simpson, S. Cotecchia, D. G. Rokosh, W. Grossman, E. Foster, and P. C. Simpson. 2003. The  $\alpha_1A/C$ - and  $\alpha_1B$ -adrenergic receptors are required for physiological cardiac hypertrophy in the double-knockout mouse. *J Clin Invest.* 111:1783–1791.

- [14] Jafri, M. S., J. J. Rice, and R. L. Winslow. 1998. Cardiac  $\text{Ca}^{2+}$  dynamics: The roles of ryanodine receptor adaptation and sarcoplasmic reticulum load. *Biophys J.* 74:1149–1168.
- [15] Berry, R. G., S. Despa, W. Fuller, D. M. Bers, and M. J. Shattock. 2007. Differential distribution and regulation of mouse cardiac  $\text{Na}^+/\text{K}^+$ -ATPase  $\alpha_1$  and  $\alpha_2$  subunits in T-tubule and surface sarcolemmal membranes. *Cardiovasc Res.* 73:92–100.
- [16] Despa, S., F. Brette, O. C.H., and D. M. Bers. 2003. Na/Ca exchange and Na/K-ATPase function are equally concentrated in transverse tubules of rat ventricular myocytes. *Biophys J.* 85:3388–3396.
- [17] Yang, Z., C. Pascarel, D. S. Steele, K. Komukai, F. Brette, and C. H. Orchard. 2002.  $\text{Na}^+$ - $\text{Ca}^{2+}$  exchange activity is localized in the T-tubules of rat ventricular myocytes. *Circ Res.* 91:315–322.
- [18] Scriven, D. R. L., P. Dan, and E. D. W. Moore. 2000. Distribution of proteins implicated in excitation-contraction coupling in rat ventricular myocytes. *Biophys J.* 79:2682–2691.
- [19] Kawai, M., M. Hussain, and C. H. Orchard. 1999. Excitation-contraction coupling in rat ventricular myocytes after formamide-induced detubulation. *Am J Physiol Heart Circ Physiol.* 277:H603–H609.
- [20] Brette, F., and C. H. Orchard. 2006. Density and sub-cellular distribution of cardiac and neuronal sodium channel isoforms in rat ventricular myocytes. *Biochem Biophys Res Commun.* 348:1163 – 1166.
- [21] Despa, S., M. A. Islam, S. M. Pogwizd, and D. M. Bers. 2002. Intracellular  $[\text{Na}^+]$  and  $\text{Na}^+$  pump rate in rat and rabbit ventricular myocytes. *J Physiol.* 539:133–143.
- [22] Stimers, J. R., S. Liu, and T. A. Kinard. 1993. Effect of Nai on activity and voltage dependence of the Na/K pump in adult rat cardiac myocytes. *J Membr Biol.* 135:39–47.
- [23] Han, F., J. Bossuyt, S. Despa, A. L. Tucker, and D. M. Bers. 2006. Phospholemman phosphorylation mediates the protein kinase C-dependent effects on  $\text{Na}^+/\text{K}^+$  pump function in cardiac myocytes. *Circ Res.* 99:1376–1383.
- [24] Balser, J. R. 2001. The cardiac sodium channel: Gating function and molecular pharmacology. *Journal of Molecular and Cellular Cardiology.* 33:599–613.
- [25] Maltsev, V. A., N. Silverman, H. N. Sabbah, and A. I. Undrovinas. 2007. Chronic heart failure slows late sodium current in human and canine ventricular myocytes: Implications for repolarization variability. *European Journal of Heart Failure.* 9:219–227.
- [26] Niederer, S. A., and N. P. Smith. 2007. A mathematical model of the slow force response to stretch in rat ventricular myocytes. *Biophys J.* 92:4030–4044.
- [27] Crampin, E. J., and N. P. Smith. 2006. A dynamic model of excitation-contraction coupling during acidosis in cardiac ventricular myocytes. *Biophys J.* 90:3074–3090.
- [28] Swietach, P., and R. D. Vaughan-Jones. 2005. Relationship between intracellular pH and proton mobility in rat and guinea-pig ventricular myocytes. *The Journal of Physiology.* 566:793–806.
- [29] Suga, H. 1979. Total mechanical energy of a ventricle model and cardiac oxygen consumption. *American Journal of Physiology - Heart and Circulatory Physiology.* 236:H498–H505.
- [30] Troy, B. L., J. Pombo, and C. E. Rackley. 1972. Measurement of left ventricular wall thickness and mass by echocardiography. *Circulation.* 45:602–611.

- [31] Vliegen, H. W., A. Van der Laarse, C. J. Cornelisse, and F. Eulderink. 1991. Myocardial changes in pressure overload-induced left ventricular hypertrophy. *European Heart Journal*. 12:488–494.
- [32] Gibbs, C. L., and D. S. Loiselle. 2001. Cardiac basal metabolism. *The Japanese Journal of Physiology*. 51:399–426.

Table S1: Fitted parameter values for NCX, PMCA and SERCA. First fit was obtained by setting initial  $[Ca^{2+}]_{jc}$  and  $[Ca^{2+}]_{sl}$  equal to the experimentally measured level of  $[Ca^{2+}]_i$  at approximately 100 ms post-peak  $[Ca^{2+}]_i$ . Second fit was obtained by using the interpolated  $[Ca^{2+}]_{jc}$  and  $[Ca^{2+}]_{sl}$  values, according to the relationship in Fig. S6, as initial conditions.

|                                                                          | FF        |            | KO             |                |
|--------------------------------------------------------------------------|-----------|------------|----------------|----------------|
|                                                                          | First fit | Second fit | First fit      | Second fit     |
| $V_{NCX}^{max}$ ( $\mu\text{mol}\cdot\text{L}^{-1}\cdot\text{ms}^{-1}$ ) | 1.1009    | 1.1591     | 6.4554         | 6.4116         |
| $I_{PMCA}^{max}$ (pA/pF)                                                 | 0.3509    | 0.5644     | 1.1299         | 1.1231         |
| $K_{m,PMCA}$ ( $\mu\text{mol/L}$ )                                       | 0.2544    | 0.3506     | 0.3506 (fixed) | 0.3506 (fixed) |
| $V_{up}$ ( $\mu\text{mol}\cdot\text{L}^{-1}\cdot\text{ms}^{-1}$ )        | 0.35      | 0.35       | 0.07           | 0.07           |
| $K_{m,up}$ ( $\mu\text{mol/L}$ )                                         | 0.4928    | 0.4928     | 0.4928 (fixed) | 0.4928 (fixed) |

Table S2: Echocardiography measurements (1) and calculations of mechanical work of the heart.

| Measurements/Calculations         | FF     | 4-week KO | 7-week KO |
|-----------------------------------|--------|-----------|-----------|
| Systolic pressure (mmHg)          | 90     | 87        | 88        |
| End-diastolic pressure (mmHg)     | 4      | 10        | 19        |
| Heart rate (bpm)                  | 443    | 377       | 433       |
| LV diastolic dimension (mm)       | 3.83   | 3.99      | 3.6       |
| Posterior wall thickness diastole | 0.95   | 0.99      | 0.91      |
| Cardiac output (ml/min)           | 24.6   | 21.1      | 15.7      |
| Stroke Volume (ml)                | 0.0555 | 0.0560    | 0.0363    |
| External work(mmHg ml/beat)       | 4.77   | 4.31      | 2.50      |
| LVCV (ml)                         | 0.059  | 0.067     | 0.049     |
| LVWV (ml)                         | 0.11   | 0.12      | 0.09      |
| Potential work (mmHg ml/beat)     | 0.14   | 0.41      | 0.43      |
| Total work (mmHg ml/beat)         | 4.9    | 4.7       | 2.9       |



Table S3: Parameter definitions and values

| Parameter         | Definition                                                                               | FF value              | 4wk KO                | 7wk KO                |
|-------------------|------------------------------------------------------------------------------------------|-----------------------|-----------------------|-----------------------|
| $C_m$             | Specific membrane capacitance ( $\mu\text{F}/\text{cm}^2$ )                              | 1.0                   | 1.0                   | 1.0                   |
| $F$               | Faraday constant (C/mmol)                                                                | 96.5                  | 96.5                  | 96.5                  |
| $T$               | Absolute temperature (K)                                                                 | 310                   | 310                   | 310                   |
| $R$               | Ideal gas constant ( $\text{J}\cdot\text{mol}^{-1}\cdot\text{K}^{-1}$ )                  | 8.314                 | 8.314                 | 8.314                 |
| $A_{tot}$         | Total membrane area ( $\text{cm}^{-2}$ )                                                 | $1.48\times 10^{-4}$  | $1.48\times 10^{-4}$  | $1.48\times 10^{-4}$  |
| $A_{jc}:A_{tot}$  | Ratio between junctional membrane and total membrane areas                               | 0.19                  | 0.19                  | 0.19                  |
| $V_{myo}$         | Myoplasmic volume ( $\mu\text{L}$ )                                                      | $2.2\times 10^{-5}$   | $2.2\times 10^{-5}$   | $2.2\times 10^{-5}$   |
| $V_{jc}$          | Junctional space volume ( $\mu\text{L}$ )                                                | $2.2\times 10^{-8}$   | $2.2\times 10^{-8}$   | $2.2\times 10^{-8}$   |
| $V_{sl}$          | Subsarcolemmal space volume ( $\mu\text{L}$ )                                            | $4.4\times 10^{-7}$   | $4.4\times 10^{-7}$   | $4.4\times 10^{-7}$   |
| $V_{JSR}$         | Junctional SR volume ( $\mu\text{L}$ )                                                   | $7.7\times 10^{-8}$   | $7.7\times 10^{-8}$   | $7.7\times 10^{-8}$   |
| $V_{NSR}$         | Network SR volume ( $\mu\text{L}$ )                                                      | $2.31\times 10^{-7}$  | $2.31\times 10^{-7}$  | $2.31\times 10^{-7}$  |
| $B_{max}$         | Max. buffering capacity ( $\mu\text{mol}/\text{L}$ )                                     | 109                   | 109                   | 109                   |
| $K_{dbuffer}$     | Affinity of buffer to $\text{Ca}^{2+}$ ( $\mu\text{mol}/\text{L}$ )                      | 0.6                   | 0.6                   | 0.6                   |
| $CSQN_{tot}$      | CSQN: total concentration in JSR (mmol/L)                                                | 50000                 | 50000                 | 50000                 |
| $K_m^{CSQN}$      | CSQN: affinity to $\text{Ca}^{2+}$ (mmol/L)                                              | 630                   | 630                   | 630                   |
| $K_{m,up}$        | SERCA : affinity to $\text{Ca}^{2+}$ ( $\mu\text{mol}/\text{L}$ )                        | 0.430                 | 0.430                 | 0.430                 |
| $V_{up}$          | SERCA: max. uptake rate ( $\mu\text{mol}\cdot\text{L}^{-1}\cdot\text{ms}^{-1}$ )         | 0.350                 | 0.148                 | 0.07                  |
| $V_{leak}$        | SR leak: rate constant ( $\text{ms}^{-1}$ )                                              | $2.0\times 10^{-5}$   | $3.0\times 10^{-5}$   | $2.0\times 10^{-5}$   |
| $D_{Ca(jcsl)}$    | $\text{Ca}^{2+}$ diffusion coefficient from jc to sl( $\text{cm}^2\text{s}^{-1}$ )       | $1.64\times 10^{-6}$  | $1.64\times 10^{-6}$  | $1.64\times 10^{-6}$  |
| $D_{Ca(slcyt)}$   | $\text{Ca}^{2+}$ diffusion coefficient from sl to cytosol ( $\text{cm}^2\text{s}^{-1}$ ) | $1.22\times 10^{-6}$  | $1.22\times 10^{-6}$  | $1.22\times 10^{-6}$  |
| $D_{Na(jcsl)}$    | $\text{Na}^{+}$ diffusion coefficient from jc to sl( $\text{cm}^2\text{s}^{-1}$ )        | $1.09\times 10^{-5}$  | $1.09\times 10^{-5}$  | $1.09\times 10^{-5}$  |
| $D_{Na(slcyt)}$   | $\text{Ca}^{2+}$ diffusion coefficient from sl to cytosol ( $\text{cm}^2\text{s}^{-1}$ ) | $1.79\times 10^{-5}$  | $1.79\times 10^{-5}$  | $1.79\times 10^{-5}$  |
| $A_{(jcsl)}$      | Area of diffusion between jc and sl ( $\text{cm}^2$ )                                    | $5.27\times 10^{-6}$  | $5.27\times 10^{-6}$  | $5.27\times 10^{-6}$  |
| $A_{(slcyt)}$     | Area of diffusion between sl and cytosol ( $\text{cm}^2$ )                               | $1.20\times 10^{-4}$  | $1.20\times 10^{-4}$  | $1.20\times 10^{-4}$  |
| $\Delta_x(jcsl)$  | Distance of diffusion between jc and sl ( $\mu\text{m}$ )                                | 0.41                  | 0.41                  | 0.41                  |
| $\Delta_x(slcyt)$ | Distance of diffusion between sl and cytosol ( $\mu\text{m}$ )                           | 0.45                  | 0.45                  | 0.45                  |
| $A_{PRyR}$        | $P_{RyR}$ : $\text{Ca}^{2+}$ release modulating constant A ( $\text{ms}^{-1}$ )          | -0.2                  | -0.2                  | -0.2                  |
| $B_{PRyR}$        | $P_{RyR}$ : $\text{Ca}^{2+}$ release modulating constant B ( $\text{ms}^{-1}$ )          | -3.0                  | -3.0                  | -3.0                  |
| $k_a^+$           | RyR: $P_{C1} - P_{O1}$ rate constant ( $\mu\text{mol}/\text{L}^{-4}/\text{ms}$ )         | $6.075\times 10^{-6}$ | $6.075\times 10^{-6}$ | $6.075\times 10^{-6}$ |
| $k_a^-$           | RyR: $P_{C1} - P_{O1}$ rate constant ( $\mu\text{mol}/\text{L}^{-4}/\text{ms}$ )         | 0.0713                | 0.0713                | 0.0713                |
| $k_b^+$           | RyR: $P_{O1} - P_{O2}$ rate constant ( $\mu\text{mol}/\text{L}^{-3}/\text{ms}$ )         | $4.05\times 10^{-6}$  | $4.05\times 10^{-6}$  | $4.05\times 10^{-6}$  |
| $k_b^-$           | RyR: $P_{O2} - P_{O1}$ rate constant ( $\text{ms}^{-1}$ )                                | 0.965                 | 0.965                 | 0.965                 |
| $k_c^+$           | RyR: $P_{O1} - P_{C2}$ rate constant ( $\text{ms}^{-1}$ )                                | 0.009                 | 0.009                 | 0.009                 |
| $k_c^-$           | RyR: $P_{C2} - P_{O1}$ rate constant ( $\text{ms}^{-1}$ )                                | 0.0008                | 0.0008                | 0.0008                |
| $n$               | RyR: $\text{Ca}^{2+}$ cooperativity parameter $P_{C1} - P_{O1}$                          | 4.0                   | 4.0                   | 4.0                   |
| $m$               | RyR: $\text{Ca}^{2+}$ cooperativity parameter $P_{O1} - P_{O2}$                          | 3.0                   | 3.0                   | 3.0                   |
| $\tau_{tr}$       | Time constant for transfer from NSR to JSR (ms)                                          | 20                    | 20                    | 20                    |
| $V_{rel}$         | RyR: max. $\text{Ca}^{2+}$ permeability ( $\text{ms}^{-1}$ )                             | 4.5                   | 4.5                   | 4.5                   |
| $V_{NCX}^{max}$   | NCX: max. exchange rate (pA/pF)                                                          | 1.1591                | 1.656                 | 6.412                 |
| $K_{m,Cao}$       | NCX: affinity to extracellular $\text{Ca}^{2+}$ ( $\mu\text{mol}/\text{L}$ )             | 1400                  | 1400                  | 1400                  |
| $K_{m,Cai}$       | NCX : affinity to intracellular $\text{Ca}^{2+}$ ( $\mu\text{mol}/\text{L}$ )            | 3.6                   | 3.6                   | 3.6                   |
| $K_{m,Na_i}$      | NCX : affinity to intracellular $\text{Na}^{+}$ ( $\mu\text{mol}/\text{L}$ )             | 12000                 | 12000                 | 12000                 |
| $K_{m,Na_o}$      | NCX : affinity to extracellular $\text{Na}^{+}$ ( $\mu\text{mol}/\text{L}$ )             | 88000                 | 88000                 | 88000                 |
| $k_{sat}$         | NCX: saturation factor                                                                   | 0.27                  | 0.27                  | 0.27                  |
| $\eta$            | NCX: V-dependence factor                                                                 | 0.35                  | 0.35                  | 0.35                  |
| $K_{mallo}$       | NCX: allosteric regulation ( $\mu\text{mol}/\text{L}$ )                                  | 0.0                   | 0.0                   | 0.0                   |
| $K_{m,PMCA}$      | PMCA: affinity of the pump to $\text{Ca}^{2+}$ ( $\mu\text{mol}/\text{L}$ )              | 0.351                 | 0.351                 | 0.351                 |

Continued on next page

Table S3 – continued from previous page

| Parameter                  | Definition                                                                                     | FF                   | 4wk KO               | 7wk KO               |
|----------------------------|------------------------------------------------------------------------------------------------|----------------------|----------------------|----------------------|
| $I_{PMCA}^{max}$           | PMCA: max. pump current (pA/pF)                                                                | 0.564                | 0.621                | 1.123                |
| $P_{CaL}$                  | LCC: permeability of the channel ( $\mu\text{L}/\text{ms}$ )                                   | $1.9 \times 10^{-7}$ | $2.0 \times 10^{-7}$ | $2.0 \times 10^{-7}$ |
| $\Phi_L$                   | LCC: proportion of time closed in open mode                                                    | 2.5                  | 2.5                  | 2.5                  |
| $t_L$                      | LCC: time switching between C and O states (ms)                                                | 9.0                  | 6.0                  | 11.0                 |
| $V_L$                      | LCC: potential when half LCC open (mV)                                                         | -5.0                 | -5.0                 | -5.0                 |
| $\Delta V_L$               | LCC: width of opening potentials (mV)                                                          | 8.0                  | 8.0                  | 8.0                  |
| $K_L$                      | LCC: concentration at inactivation ( $\mu\text{mol}/\text{L}$ )                                | 0.8                  | 0.7                  | 0.6                  |
| $\tau_L$                   | LCC: inactivation time (ms)                                                                    | 400.0                | 600.0                | 400.0                |
| $a$                        | LCC: biasing to make inactivation function of V                                                | 0.3                  | 0.3                  | 0.3                  |
| $b$                        | LCC: biasing to make inactivation function of V                                                | 0.4                  | 0.4                  | 0.4                  |
| $C_1$                      | LCC: V-dependent inactivation constant 1 (mV)                                                  | 33                   | 33                   | 33                   |
| $C_2$                      | LCC: V-dependent inactivation constant 2 (mV)                                                  | 8.2                  | 8.2                  | 8.2                  |
| $C_3$                      | LCC: V-dependent inactivation constant 3 (ms)                                                  | 0.1                  | 0.1                  | 0.1                  |
| $C_4$                      | LCC: V-dependent inactivation constant 4 (mV)                                                  | 40                   | 40                   | 40                   |
| $C_5$                      | LCC: V-dependent inactivation constant 5 (mV)                                                  | 6                    | 6                    | 6                    |
| $C_6$                      | LCC: V-dependent inactivation constant 6 (ms)                                                  | 5                    | 5                    | 10                   |
| $C_7$                      | LCC: V-dependent inactivation constant 7 (ms)                                                  | 315                  | 315                  | 315                  |
| $C_8$                      | LCC: V-dependent inactivation constant 8 (mV)                                                  | 30                   | 24                   | 26                   |
| $C_9$                      | LCC: V-dependent inactivation constant 9 (mV)                                                  | 4.5                  | 4.5                  | 4.5                  |
| $I_{NKA,\alpha 1}$         | Maximum NKA current for $\alpha_1$ isoform (pA/pF)                                             | 5.2                  | 5.2                  | 4.4                  |
| $I_{NKA,\alpha 2}$         | Maximum NKA current for $\alpha_2$ isoform (pA/pF)                                             | 1.95                 | 1.95                 | 0.9                  |
| $K_{m,Ko}$                 | Extracellular $\text{K}^+$ -affinity of NKA $\alpha_1$ isoform ( $\mu\text{mol}/\text{L}$ )    | 1500.0               | 1500.0               | 1500.0               |
| $K_{m,Na i,\alpha 1}$      | Intracellular $\text{Na}^+$ -affinity of NKA $\alpha_1$ isoform ( $\mu\text{mol}/\text{L}$ )   | 21000                | 21000                | 21000                |
| $K_{m,Na i,\alpha 2}$      | Intracellular $\text{Na}^+$ -affinity of NKA $\alpha_2$ isoform ( $\mu\text{mol}/\text{L}$ )   | 21000                | 21000                | 21000                |
| $f_{NKA,\alpha 1,const 1}$ | Constant 1 for V-dependence of NKA $\alpha_1$ isoform                                          | 0.2946               | 0.2946               | 0.2946               |
| $f_{NKA,\alpha 1,const 2}$ | Constant 2 for V-dependence of NKA $\alpha_1$ isoform                                          | 0.0164               | 0.0164               | 0.0164               |
| $nh$                       | Hill coefficient for $\text{Na}^+$ binding of NKA $\alpha_1$ and $\alpha_2$ isoforms           | 3.0                  | 3.0                  | 3.0                  |
| $K_{i,NHE}$                | $\text{H}^+$ -affinity allosteric regulation of NHE by intracellular $\text{H}^+$              | 0.411                | 0.411                | 0.411                |
| $nh$                       | Hill coefficient for allosteric regulation of NHE by intracellular $\text{H}^+$                | 2.905                | 2.905                | 2.905                |
| $G_{Cab}$                  | $I_{Cab}$ : max. conductance of the channel (mS/ $\mu\text{F}$ )                               | 0.0004               | 0.0004               | 0.0004               |
| $P_{anion}$                | Permeability for anion flux (cm/s)                                                             | 0                    | 0                    | $1.0 \times 10^{-7}$ |
| $J_{acid}$                 | Rate of intracellular acid production ( $\mu\text{mol}\cdot\text{L}^{-1}\cdot\text{ms}^{-1}$ ) | 0                    | 0                    | 0.045                |
| $P_{Cl}$                   | Rate of intracellular acid production (cm/s)                                                   | $1.3 \times 10^{-8}$ | $1.3 \times 10^{-8}$ | $1.3 \times 10^{-8}$ |

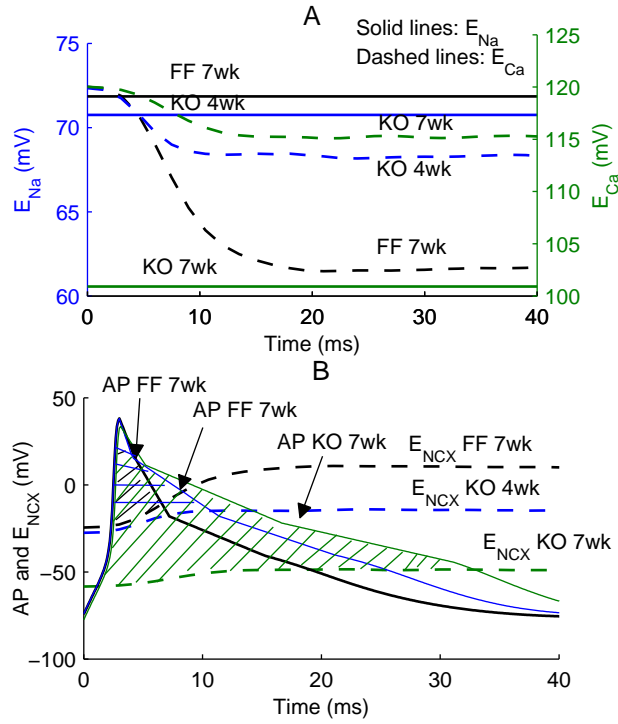

Figure S1: A: Reversal potentials for  $Na^+$  ( $E_{Na}$ ) and  $Ca^{2+}$  ( $E_{Ca}$ ) estimated from the experimentally measured  $[Na^+]_i$  and  $[Ca^{2+}]_i$  in the FF, 4-week and 7-week KO during a cardiac cycle at 1 Hz. B: NCX reversal potential ( $E_{NCX}$ ) calculated as  $3 \times E_{Na} - 2 \times E_{Ca}$  for the FF, 4-week and 7-week KO models, and their APs reconstructed from experimentally measured average APDs

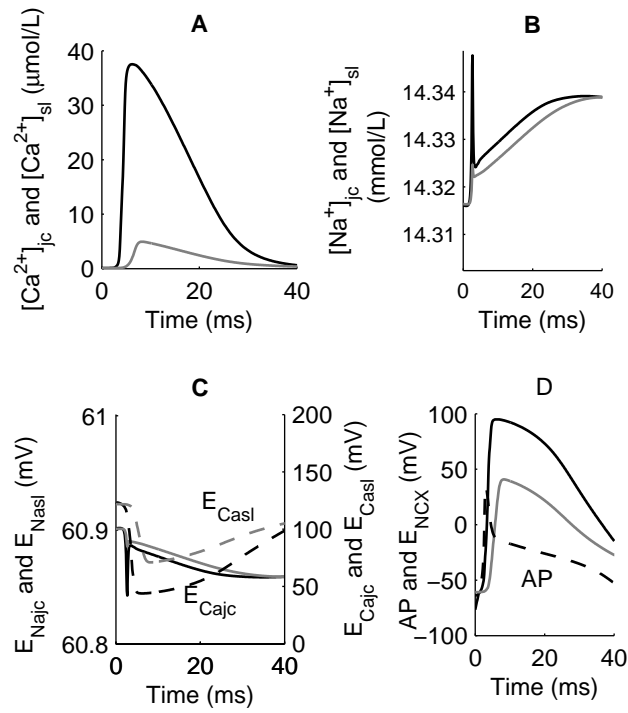

Figure S2: A: Simulated  $[Ca^{2+}]_{jc}$  (black) and  $[Ca^{2+}]_{sl}$  (grey) at 1 Hz in the 7-week KO model using the framework with a subsarcolemmal compartment. B: Simulated  $[Na^+]_{jc}$  (black) and  $[Na^+]_{sl}$  (grey) at 1 Hz in the 7-week KO model using the framework with a subsarcolemmal compartment. C: Reversal potentials for  $Na^+$  ( $E_{Na}$ ) (solid lines) and  $Ca^{2+}$  ( $E_{Ca}$ ) (dashed lines) in the junctional (black) and sarcolemmal membranes (grey), calculated from the simulated concentrations in A and B. D:  $NCX$  reversal potential ( $E_{NCX}$ ) in the junctional (black) and sarcolemmal (grey) membranes, calculated as  $3 \times E_{Na} - 2 \times E_{Ca}$ , as well as the simulated AP.

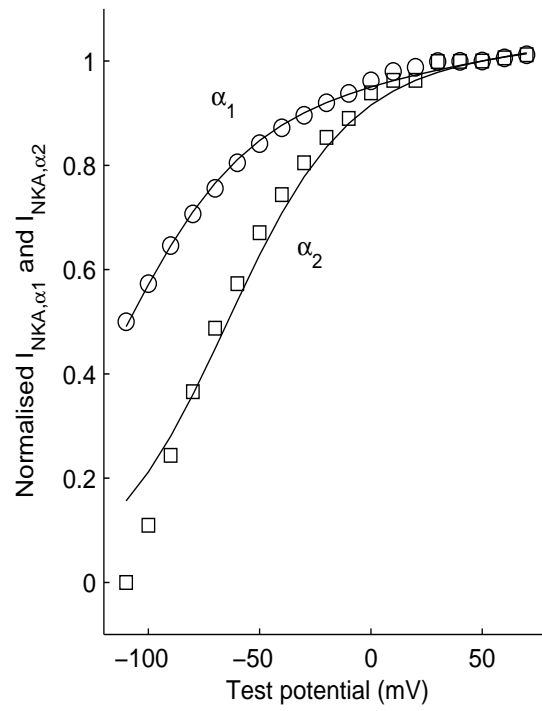

Figure S3: Experimentally measured I-V relationship of the  $\alpha_1$  (circles) and  $\alpha_2$  (squares) isoforms of NKA in rat ventricular myocytes (8). Superimposed (solid lines) are the fitted I-V relationship.

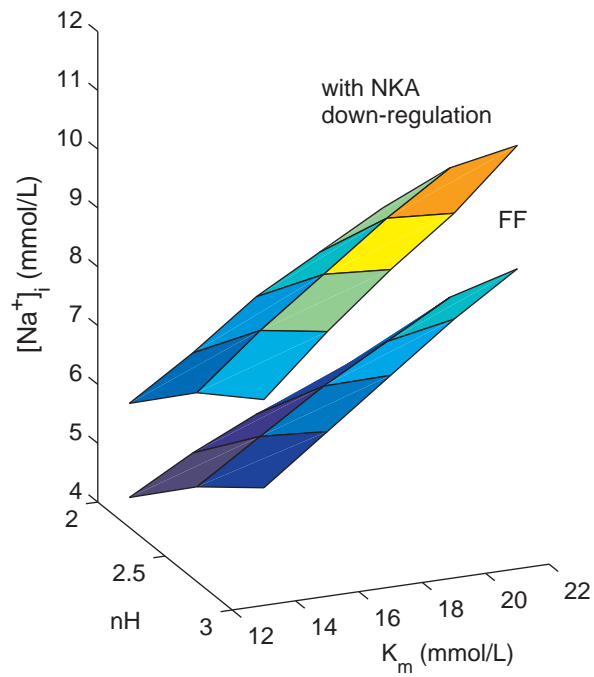

Figure S4: Simulated  $[Na^+]_i$  at 1 Hz pacing frequency with various combinations of the  $Na^+$  affinity ( $K_m$ ) and the hill coefficient ( $nH$ ). For FF,  $I_{NKA,\alpha1}^{max}$  and  $I_{NKA,\alpha2}^{max}$  were fitted to experimentally measured  $I_{NKA,\alpha1}$  and  $I_{NKA,\alpha2}$ , respectively (see explanation in text). The effect of NKA-downregulation was examined by adjusting  $I_{NKA,\alpha1}^{max}$  and  $I_{NKA,\alpha2}^{max}$  to match the experimentally observed reductions in  $I_{NKA,\alpha1}$  and  $I_{NKA,\alpha2}$ .

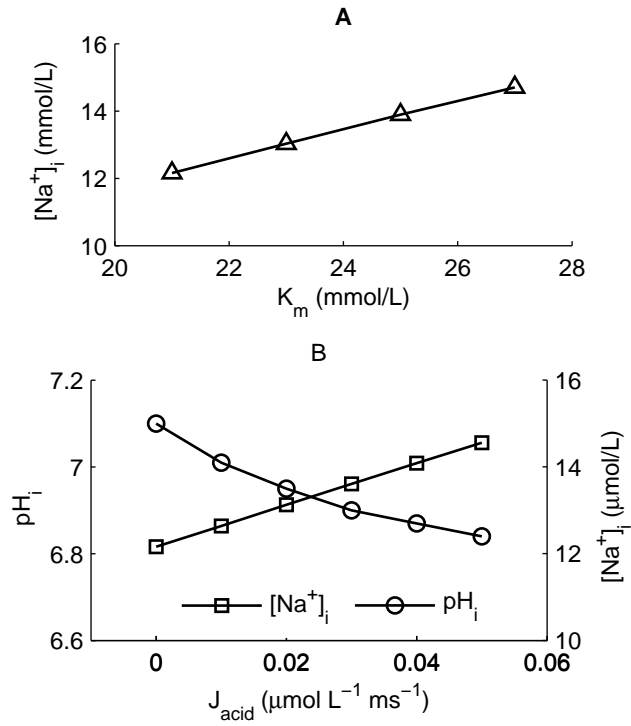

Figure S5: A. Simulated  $[Na^+]_i$  at 1 Hz pacing frequency as a function of the  $Na^+$  affinity of NKA. B. Simulated  $pH_i$  (circles) and  $[Na^+]_i$  (squares) as a function of the size of the intracellular acid source.

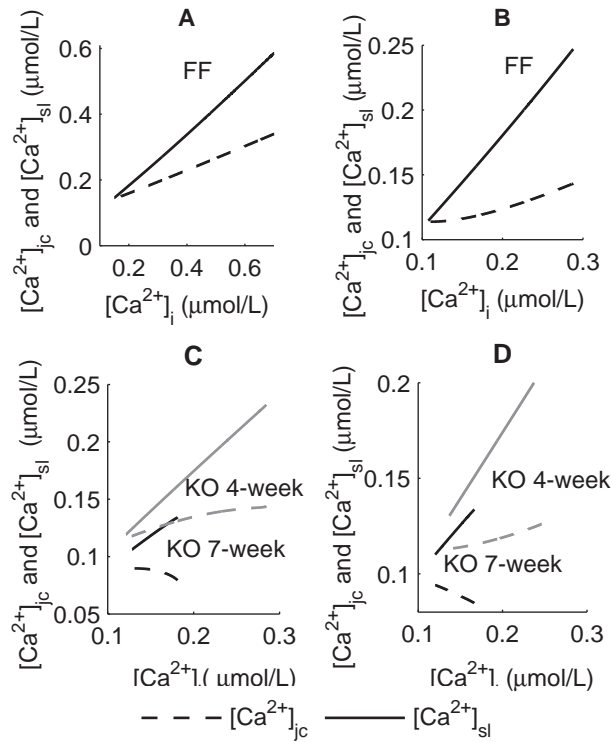

Figure S6: A. Simulated relationship between  $[Ca^{2+}]_{sl}$  (solid lines),  $[Ca^{2+}]_{sl}$  (dashed lines) and  $[Ca^{2+}]_i$  during the decay phase of a caffeine-induced  $[Ca^{2+}]_i$  transient in the FF model. B. Simulated relationship between  $[Ca^{2+}]_{sl}$  (solid lines),  $[Ca^{2+}]_{sl}$  (dashed lines) and  $[Ca^{2+}]_i$  during the decay phase of field-stimulated  $[Ca^{2+}]_i$  transient at 1 Hz in the FF model. C. Simulated relationship between  $[Ca^{2+}]_{sl}$  (solid lines),  $[Ca^{2+}]_{sl}$  (dashed lines) and  $[Ca^{2+}]_i$  in the KO 4-week model, during the decay phase of a caffeine-induced  $[Ca^{2+}]_i$  transient, and in the KO 7-week model during the decay phase of a field-stimulated  $[Ca^{2+}]_i$  transient at 0.5 Hz in the presence of caffeine. D. Simulated relationship between  $[Ca^{2+}]_{sl}$  (solid lines),  $[Ca^{2+}]_{sl}$  (dashed lines) and  $[Ca^{2+}]_i$  in the KO 4-week and KO 7-week models, during the decay phase of a field-stimulated  $[Ca^{2+}]_i$  transient at 1 Hz.



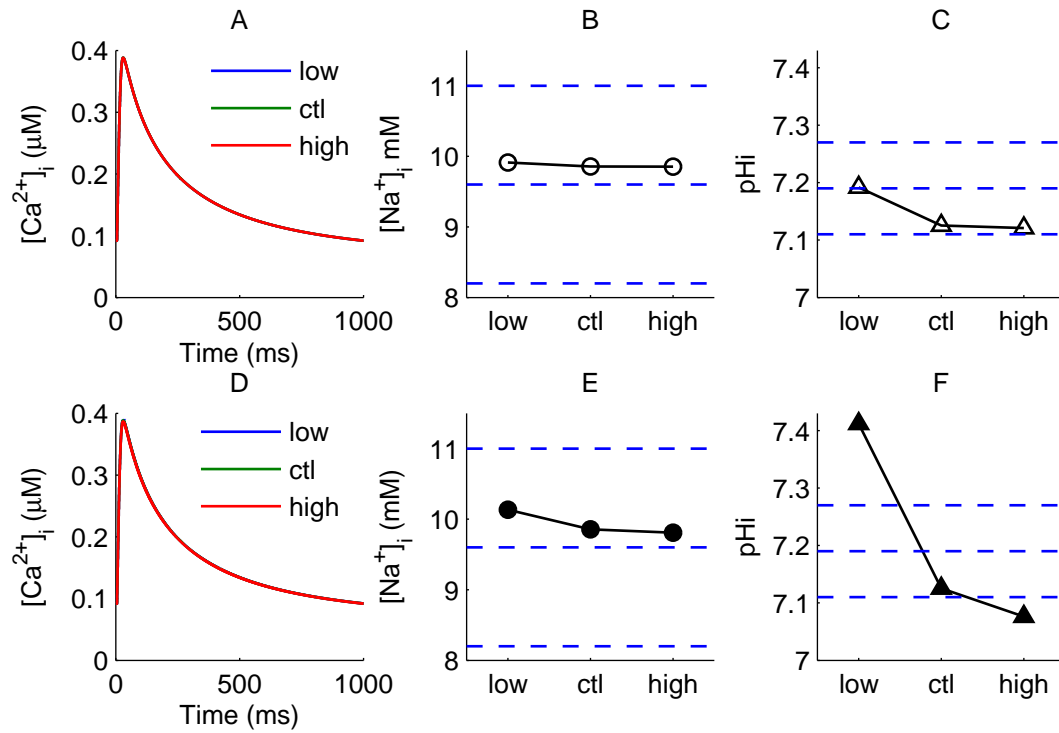

Figure S7: A-C. Simulated  $[Ca^{2+}]_i$  transients,  $[Na^+]_i$  and  $pH_i$  levels in the FF model, using the fitted (control or ctl) NHE  $K_i$  value, as well as the low and high values found in literature. D-F. Simulated  $[Ca^{2+}]_i$  transients,  $[Na^+]_i$  and  $pH_i$  levels in the FF model, using the fitted NHE  $nh$  value, as well as the low and high values found in literature. Dashed lines represent experimentally measured average  $[Na^+]_i$  and  $pH_i$ , and average  $\pm$  standard error of the mean (SEM).

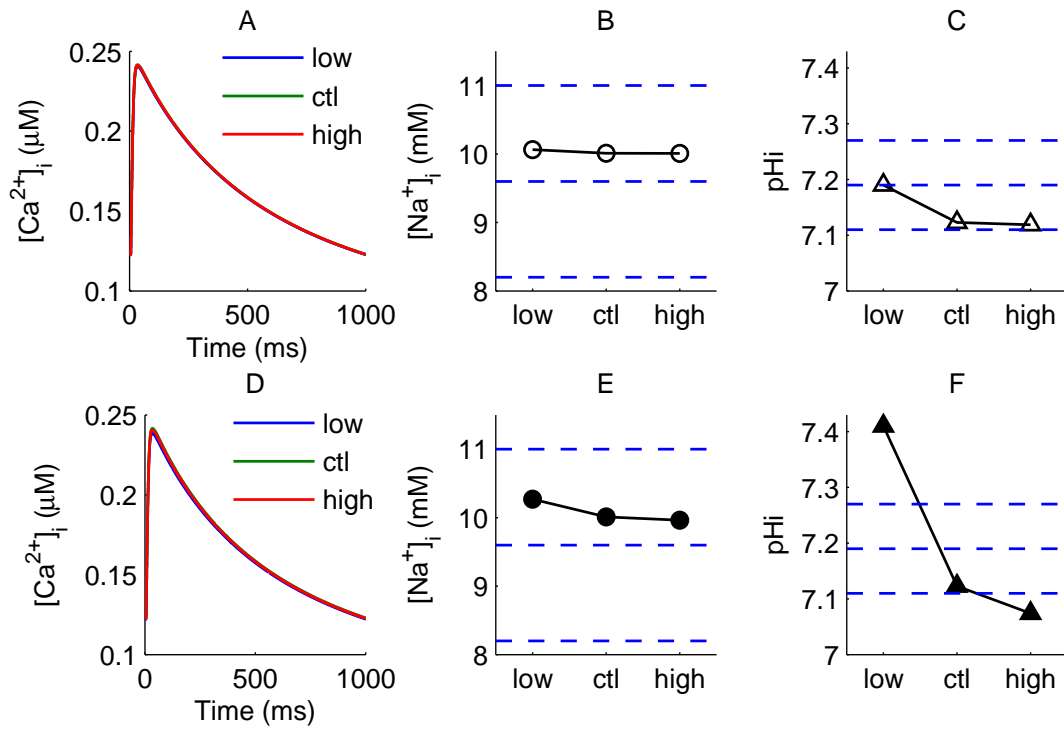

Figure S8: A-C. Simulated  $[Ca^{2+}]_i$  transients,  $[Na^+]_i$  and  $pH_i$  levels in the 4-week KO model, using the fitted (control or ctl) NHE  $K_i$  value, as well as the low and high values found in literature. D-F. Simulated  $[Ca^{2+}]_i$  transients,  $[Na^+]_i$  and  $pH_i$  levels in the 4-week KO model, using the fitted NHE  $n_h$  value, as well as the low and high values found in literature. Dashed lines represent experimentally measured average  $[Na^+]_i$  and  $pH_i$ , and average  $\pm$  standard error of the mean (SEM).

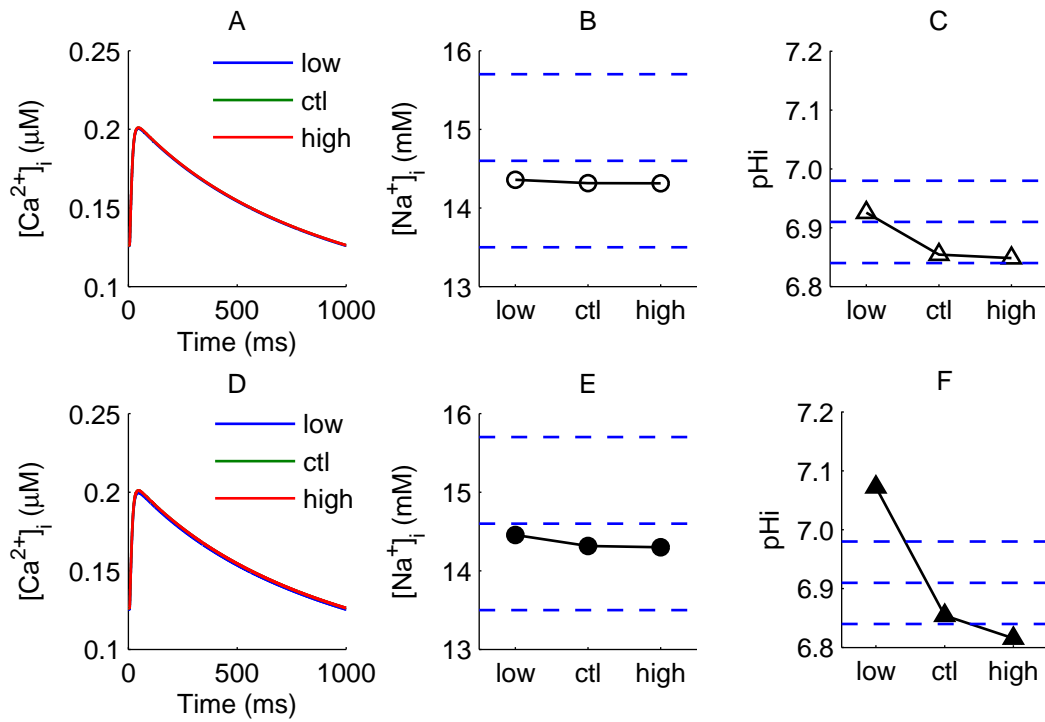

Figure S9: A-C. Simulated  $[Ca^{2+}]_i$  transients,  $[Na^+]_i$  and  $pH_i$  levels in the 7-week KO model, using the fitted (control or ctl) NHE  $K_i$  value, as well as the low and high values found in literature. D-F. Simulated  $[Ca^{2+}]_i$  transients,  $[Na^+]_i$  and  $pH_i$  levels in the 7-week KO model, using the fitted NHE  $n_h$  value, as well as the low and high values found in literature. Dashed lines represent experimentally measured average  $[Na^+]_i$  and  $pH_i$ , and average  $\pm$  standard error of the mean (SEM).

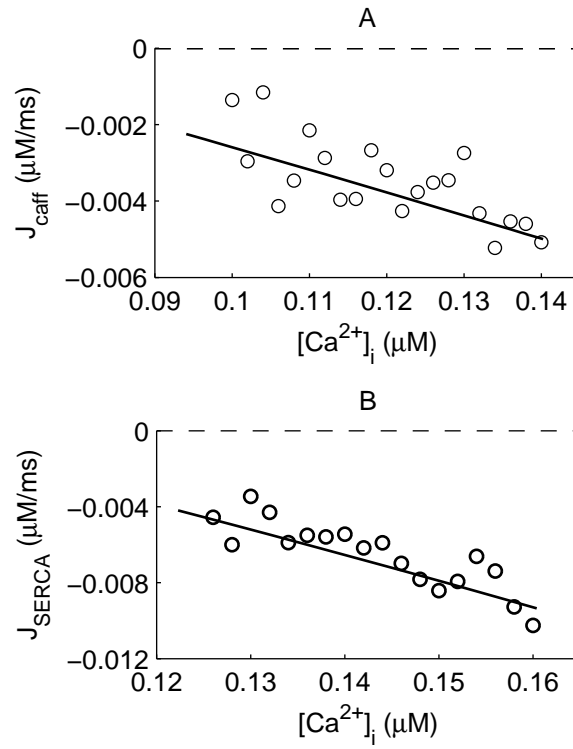

Figure S10: Fitted (solid lines) and experimentally measured (circles)  $Ca^{2+}$  fluxes vs  $[Ca^{2+}]_i$  during the decay of the 1Hz  $[Ca^{2+}]_i$  transient in the presence of caffeine (A) and in normal Tyrod solution (B).

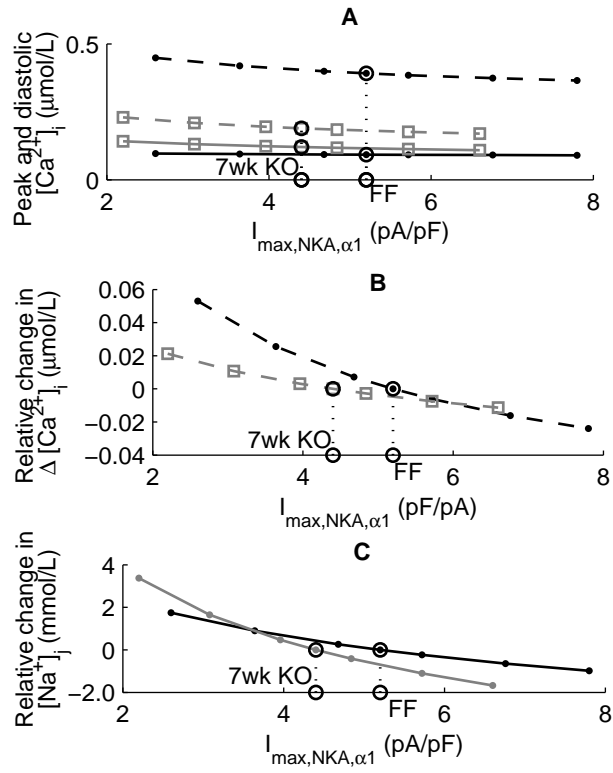

Figure S11: Simulated peak and diastolic  $[\text{Ca}^{2+}]_i$  (A),  $\Delta[\text{Ca}^{2+}]_i$  (B) and  $[\text{Na}^+]_i$  (C) in the FF and 7-week KO models, with graded NKA downregulation.

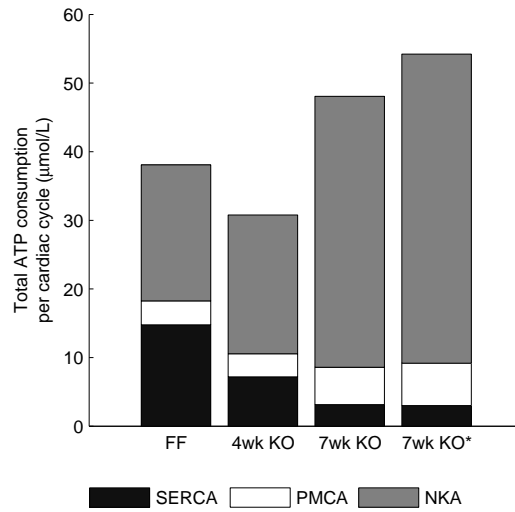

Figure S12: Comparison between simulated ATP consumption for ion transport in the FF, 4-week KO, 7-week KO, and 7-week KO\* models. 7-week KO\* model refers to the scenario of a greater cell membrane area attributed to an increased sarcolemmal membrane in the 7-week KO animals.

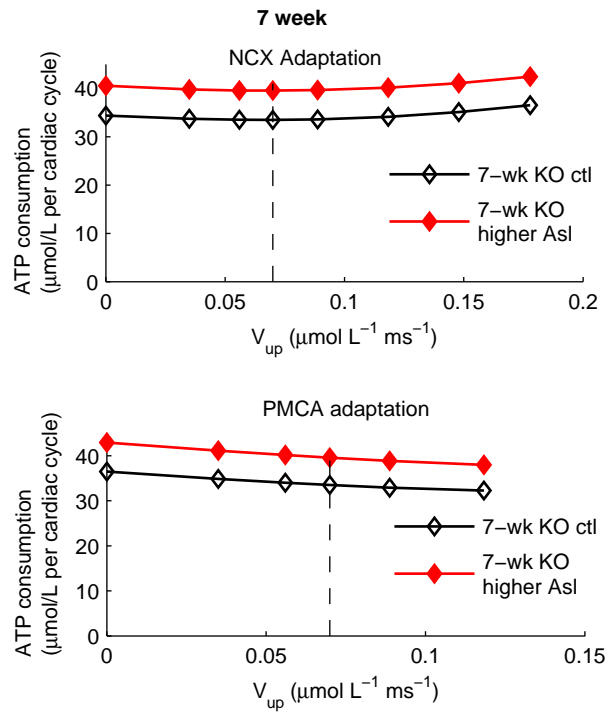

Figure S13: ATP consumption for ion transport in the case of NCX and PMCA adaptations (red) with an increased  $A_{\text{sl}}$ , compared to results with unchanged membrane areas.
